1           **The UBR-1 Ubiquitin Ligase Regulates Glutamate Metabolism to Generate**  
2                                   **Coordinated Motor Pattern in *C. elegans***

3   Jyothisna Chitturi<sup>1,2</sup>, Wesley Hung<sup>1</sup>, Anas M. Abdel Rahman<sup>1\*</sup>, Min Wu<sup>1,3</sup>, Maria A.  
4   Lim<sup>1</sup>, John Calarco<sup>4</sup>, Renee Baran<sup>5</sup>, Xun Huang<sup>6</sup>, James W. Dennis<sup>1,3</sup>, and Mei Zhen<sup>1,2,3#</sup>

5   <sup>1</sup> Lunenfeld-Tanenbaum Research Institute, Mount Sinai Hospital, Toronto, ON, Canada  
6   M5G 1X5;

7   <sup>2</sup> Institute of Medical Sciences, University of Toronto, ON, Canada M5S 1A8;

8   <sup>3</sup> Department of Molecular Genetics, University of Toronto, ON, Canada M5S 1A8

9   <sup>4</sup> FAS Center for Systems Biology, Harvard University, Cambridge, MA 02138;

10   <sup>5</sup> Department of Biology, Occidental College, Los Angeles, CA 90041;

11   <sup>6</sup> State Key Laboratory of Molecular Developmental Biology, Institute of Genetics and  
12   Developmental Biology, Chinese Academy of Sciences, Beijing 100101, China;

13   \* Current address: Department of Genetics, Alfaisal University, Riyadh, Kingdom of  
14   Saudi Arabia

15   # Correspondence: [zhen@lunenfeld.ca](mailto:zhen@lunenfeld.ca)

1 **Abstract**

2 UBR1 is an E3 ubiquitin ligase best known for its ability to target protein degradation by  
3 the N-end rule. The physiological functions of UBR family proteins, however, remain not  
4 fully understood. We found that the functional loss of *C. elegans* UBR-1 leads to a  
5 specific motor deficit: when adult animals generate reversal movements, A-class motor  
6 neurons exhibit synchronized activation, preventing body bending. This motor deficit is  
7 rescued by removing GOT-1, a transaminase that converts aspartate to glutamate. Both  
8 UBR-1 and GOT-1 are expressed and critically required in premotor interneurons of the  
9 reversal motor circuit to regulate the motor pattern. *ubr-1* and *got-1* mutants exhibit  
10 elevated and decreased glutamate level, respectively. These results raise an intriguing  
11 possibility that UBR proteins regulate glutamate metabolism, which is critical for  
12 neuronal development and signaling.

13 **Author Summary**

14 Ubiquitin-mediated protein degradation is central to diverse biological processes. The  
15 selection of substrates for degradation is carried out by the E3 ubiquitin ligases, which  
16 target specific groups of proteins for ubiquitination. The human genome encodes  
17 hundreds of E3 ligases; many exhibit sequence conservation across animal species,  
18 including one such ligase called UBR1. Patients carrying mutations in *UBR1* exhibit  
19 severe systemic defects, but the biology behinds UBR1's physiological function remains  
20 elusive. Here we found that the *C. elegans* UBR-1 regulates glutamate level. When UBR-  
21 1 is defective, *C. elegans* exhibits increased glutamate; this leads to synchronization of  
22 motor neuron activity, hence defective locomotion when animals reach adulthood.

- 1 UBR1-mediated glutamate metabolism may contribute to the physiological defects of
- 2 *UBR1* mutations.

## 1 **Introduction**

2 In eukaryotic cells, the ubiquitin-proteasome system mediates selective protein  
3 degradation (1, 2). E3 ubiquitin ligases confer substrate specificity via selective  
4 interaction with the degradation signals in substrates (3-6).

5 UBR1 acts not only as an E3 ligase for the N-end rule substrates, whose metabolic  
6 stability is determined by the identity and post-translational status of their N-terminal  
7 moiety, but also for substrates that do not harbor the N-terminal degrons (6, 7). The UBR  
8 family proteins exist from yeast to man, and have been implicated in multiple cellular  
9 processes (reviewed in 7). Yeast UBR1 is not essential, but *ubr1* mutants exhibit less  
10 efficient chromatin separation, and mildly increased doubling time (8). Yeast UBR1 also  
11 participates in protein quality control, potentiating the degradation of mis-folded proteins  
12 by ER membrane ligases (9). The loss of *C. elegans* UBR-1 results in delayed  
13 degradation of a regulator for post-embryonic hypodermic cell division, but does not  
14 cause obvious hypodermic defect (10). In mammalian cell lines, the N-end rule pathway  
15 targets pro-apoptosis fragments for degradation, affecting the efficacy of induced  
16 apoptosis (11). The simultaneous loss of two rodent UBR homologues results in  
17 embryonic lethality with severe developmental defects in the heart and brain (12). In  
18 human, loss-of-function mutations in one of several UBR family proteins, UBR1, cause  
19 the Johanson-Blizzard Syndrome (*JBS*), a genetic disorder with multi-systemic symptoms  
20 including pancreatic insufficiency, growth retardation, and cognitive impairments (13).  
21 To date, a unifying physiological function of UBR proteins in animal models and human  
22 is lacking. In fact, whether UBR1's role as an N-end rule E3 ligase is relevant for the *JBS*  
23 pathophysiology remains elusive (14).

1            *C. elegans* has a single UBR1 ortholog, UBR-1. Using this simplified animal  
2 model, we reveal that the functional loss of UBR-1 leads to a specific, late onset and  
3 prominent motor pattern change, and such a change is reversed by removing a metabolic  
4 enzyme, GOT-1, which we find to synthesize glutamate from aspartate.

5            Glutamate is an abundant amino acid. As a metabolite, it is essential for metabolism  
6 and development. As a neurotransmitter, glutamate-mediated signaling regulates animals'  
7 motor and cognitive functions (15-18). As such, glutamate level needs to be tightly  
8 regulated for metabolism, as well as neuronal signaling. Aberrant glutamate signaling has  
9 been implicated in cytotoxicity (19), and neurological disorders (20).

10           The genetic interaction between *ubr-1* and *got-1* mutants suggests that UBR-1 may  
11 affect glutamate metabolism. Consistent with this notion, we find that both genes are  
12 critically required in premotor interneurons to effect the reversal motor pattern change.  
13 Further, our metabolomics analyses reveal an inversely correlated change - increased and  
14 decreased glutamate level - in *ubr-1* and *got-1* mutant animals, respectively. These  
15 findings reveal a previously unknown role for the UBR family protein in glutamate  
16 metabolism. They further allude to the possibility that a common cellular defect, such as  
17 that in glutamate metabolism, may contribute to UBR's multi-systemic functions.

## 1 **Results**

### 2 **UBR-1 promotes bending during reversal movements**

3 Wildtype *C. elegans* generates movements through propagating body bends. In a genetic  
4 screen for mutants with altered motor patterns, we isolated *hp684* (Fig. 1A), a mutant that  
5 is capable of reversal movements, but does so with limited body flexing (Fig. 1B;  
6 Supplementary Movie 1). The stiffness is prominent during prolonged reversals, and is  
7 progressive as animals develop from the last-stage larvae into adults.

8 We quantified the motor phenotypes of one-day-old wildtype and *hp684* adults.  
9 Because the forward movement is the preferred motor state under laboratory conditions,  
10 we assayed their motor behaviors on plates where they were frequently induced for  
11 prolonged reversals (Methods). We compared their body curvature and duration of  
12 reversals during these events (Fig. 1D-F). *hp684* mutants exhibited significantly  
13 decreased mean curvature during reversals (Fig. 1D), significantly longer duration (Fig.  
14 1F), and reduced reversal initiation frequency (Fig. 1G) under the assay conditions  
15 (Methods). The bending curvature and duration of forward movements, captured during  
16 the same recording periods, were only mildly affected or unchanged in *hp684* mutant  
17 animals (Supplementary Movie 1).

18 We mapped and identified the causative genetic lesion in *hp684* mutants  
19 (Methods): a recessive and nonsense mutation that leads to truncation of the last 194  
20 amino acids (Q1864X) of UBR-1 (Fig. 1A). The UBR family proteins exhibit conserved  
21 domain organization from yeast to humans. In addition to a highly conserved C-terminal  
22 sequences, they share the N-terminal UBR box, and internal motifs that include a region  
23 enriched for basic amino acids (BRR), and a RING finger (21). The UBR box and its

1 neighboring sequences interact with the substrates and E2 ubiquitin-conjugating enzyme  
2 of the N-end rule (22), whereas the RING finger is the hallmark motif utilized by a large  
3 class of E3 ligases to recruit non-N-end rule substrates (23-25).

4 To further verify that the motor phenotypes that we observed in *hp684* mutants  
5 result from the functional loss of UBR-1, we generated multiple *ubr-1* deletion alleles,  
6 *hp820*, *hp821*, and *hp821hp833* (Fig. 1A), by CRISPR-Cas9-mediated genome editing  
7 (26) (Methods). *hp820* harbors a small in-frame deletion near the N-terminus ( $\Delta$ R18-  
8 W25); *hp821* a N-terminal four base pair deletion that leads to a frame-shift and a  
9 premature, N-terminal stop codon (E34X), and *hp821hp833*, in addition to *hp821*, a  
10 seven-base-pair deletion in the RING finger that leads to a frame shift and premature  
11 internal stop codon (E1315X). All alleles, like *hp684*, are recessive and viable, all  
12 exhibited motor defects similar to *hp684*, including reduced bending, increased duration,  
13 and reduced initiation frequency during reversal movements (Fig. 1B, 1E-G; Fig. S1).  
14 Also like *hp684*, their reversal defects were rescued by a genomic fragment that harbors  
15 only *ubr-1* (Fig. 1B-G; Fig. S1).

16 These results confirm that the motor defects exhibited by all *ubr-1* alleles result  
17 from the functional loss of UBR-1. The comparable phenotypic severity among *hp684*,  
18 *hp820*, *hp821* and *hp821hp833* mutants complements findings from the *JBS* patients,  
19 where diverse UBR1 mutations, resulting in a wide range of genetic lesions - early or late  
20 stop codons, reading frame shifts, and small internal in-frame deletions (Fig. 1A) - exert  
21 similar pathologic effects (27).

1           Hereafter, we present quantified results from the *hp684* allele unless specified, and  
2 refer to it as the *ubr-1* mutants. For behavioral analyses, we present data for reversal  
3 movements, and refer to it as the motor phenotype.

#### 4 **A critical requirement of UBR-1 in premotor interneurons to promote bending**

5 To begin probing UBR-1's function, we first examined the expression pattern of a  
6 GFP::UBR-1 reporter, which fully reversed *ubr-1* mutants' motor defects. GFP::UBR-1  
7 exhibits strong expression in a fraction of neurons and all musculatures throughout  
8 development, and weak expression in hypodermal seam cells (Fig. 2A). In the motor  
9 circuit, UBR-1::GFP's expression is prominent in premotor interneurons (INs in Fig. 2A)  
10 of the reversal motor circuit (Fig. 2A; Fig. S2A), and is absent from all ventral cord  
11 motor neurons that execute locomotion.

12           To determine the critical cellular origins of *ubr-1* mutants' motor defect, we  
13 examined the effect of restoring UBR-1 using exogenous and cell-type specific  
14 promoters. When UBR-1 expression was restored panneuronally (*Prgef-1*), the reversal  
15 motor defects (Fig. 2B) in *ubr-1* mutants were fully rescued, whereas restoring UBR-1 in  
16 muscles (*Pmyo-3*) did not (Fig. 2B; Fig. S3A, B). These results show a neuronal origin of  
17 *ubr-1* mutants' motor phenotype.

18           Through examining the effect of restoring UBR-1 expression in subgroups of motor  
19 circuit neurons that partially overlap with identified UBR-1::GFP-positive neurons, we  
20 confirmed a critical requirement of UBR-1 in premotor interneurons (Fig. 2C; Fig. S3A,  
21 B). Specifically, restoring UBR-1 expression by either *Pglr-1* or *Pnmr-1* significantly  
22 rescued *ubr-1* mutants' motor defects, including bending, duration, and frequency during  
23 reversal movements (Fig. 2C; Fig. S3A, B), whereas restoring UBR-1 in motor neurons



1 did not (Fig. 2C; Fig. S3A, B). Both *Pglr-1* and *Pnmr-1* activate expression in premotor  
2 interneurons of the reversal motor circuit, AVA, AVE, AVD, and RIM (28-30). Their  
3 activation, inactivation, and ablation affect the execution and characteristics of the  
4 reversal motor states (31-43). Importantly, restoration of UBR-1 in other interneurons,  
5 including the premotor interneurons of the forward motor circuit (AVB), did not rescue  
6 *ubr-1* mutants' motor phenotype (Table 1).

7       Within this group of premotor interneurons of the reversal circuit, restoration of  
8 UBR-1 in AVE and RIM (*Popt-3*) exerted the strongest partial rescue (Fig. 2D; Fig. S3C,  
9 D), whereas the restoration in AVA (*Prig-3*), or RIM (*Pgcy-13*) alone, led to modest to  
10 no rescue (Fig. 2D; Fig. S3C, D). UBR-1's role in the reversal motor circuit involves the  
11 whole network of premotor interneurons, with AVA, AVE, and maybe RIM being the  
12 most critical components.

### 13 **UBR-1 promotes bending by preventing simultaneous A motor neuron activation**

14 What underlies the reduced bending in *ubr-1* mutants? Premotor interneurons of the  
15 reversal motor circuit innervate the A-class motor neurons (A-MNs) (Fig. 3A). Multiple  
16 A-MNs innervate body wall muscles to execute reversal movements: they are divided  
17 into the ventral (VA) and dorsal (DA) muscle-innervating subtypes through likely non-  
18 overlapping neuromuscular junctions (32, 34, 44, 45). We examined the temporal  
19 activation pattern of a posterior cluster A-MNs, DA7, VA10, and VA11 (predicted  
20 muscle targets illustrated in Fig. 3B) in freely moving adults that express a calcium  
21 sensor GCaMP6s::wCherry (46) in these A-MNs (Methods).

22       Consistent with the notion that A-MNs execute reversal movements, they exhibited  
23 calcium changes when animals moved backwards (boxed area in Fig. 3C). While the

1 frequency and amplitude of the calcium waveforms for A-MNs varied for each reversal  
2 event (47), their calcium profiles exhibited phase relations that are consisted with the  
3 expected temporal activation of muscle groups that they are predicted to innervate.  
4 Specifically, VA10 and VA11, two A-MNs that innervate adjacent ventral muscles  
5 exhibited asynchrony in activation (red and blue traces in Fig. 3C; left panel in Fig. 3C'),  
6 with variable lags (Fig. 3G; Methods), as expected from the sequential contraction of  
7 adjacent muscles during reversals at different velocities. DA7 likely innervates dorsal  
8 muscles that appose VA10 and V11's ventral targets (Fig. 3B). Consistent with the  
9 alternating dorsal and ventral muscle contraction during bending, VA10 and DA7  
10 exhibited asynchrony of activity patterns (green and red traces in Fig. 3C; middle panel in  
11 Fig. 3C') with variable lags (Fig. 3H). DA7 and VA11 were activated in relative  
12 synchrony (green and blue traces in Fig. 3C; right panel in Fig. 3C'), exhibiting shorter  
13 lags (Fig. 3I) when compared to the other A-MN pairs. This indicates a more direct  
14 dorsal-ventral opposition between VA10 and DA7's muscle targets.

15 We observed a striking difference in A-MN's activation pattern in *ubr-1* mutants.  
16 While they also exhibited calcium changes during reversals, all three A-MNs' activation  
17 exhibited synchrony (blue, red and green traces in Fig. 3D; Fig. 3D'). This led to a drastic  
18 reduction in the mean lag times between VA10 and VA11 (Fig. 3G), and between VA10  
19 and DA7 (Fig. 3H), whereas the short lags between DA7 and VA11 remained statistically  
20 unchanged (Fig. 3I) between wildtype and *ubr-1* mutants.

21 Hence, reduced bending in *ubr-1* mutants was caused by increased synchronization,  
22 not lack of A-MNs' activities. Importantly, when UBR-1 was restored in the premotor  
23 interneurons of the reversal circuit, A-MN's phasic relationships were restored in *ubr-1*

1 mutants (Fig. 3E, E', Fig. G-I). Therefore UBR-1 plays a critical role in premotor  
2 interneurons to ensure sequential motor neuron activation, which underlies bending  
3 during reversal movements.

#### 4 **Removing the GOT-1 transaminase restores *ubr-1* mutants' bending**

5 If UBR-1, an E3 ligase, affects the animal's motor pattern through negative regulation of  
6 a biological pathway, the pattern change should be rescued by a simultaneous decrease of  
7 the activity of the pathway. Accordingly, we screened for genetic suppressors of *ubr-1*  
8 mutants' motor phenotype.

9 We isolated *hp731*, which restored bending in *ubr-1* mutants during reversal  
10 movements (Fig. 4C; Supplementary Movie 2). Notably, both *hp731* and *ubr-1; hp731*  
11 mutant animals exhibited slightly deeper bending than wildtype animals (Fig. 4C;  
12 Supplementary Movie 2). *hp731* also significantly rescued *ubr-1* mutant's change in  
13 reversal duration and frequency (Fig. S4A, B). Consistent with synchronized A-MN  
14 activation underling *ubr-1*'s lack of bending, VA10, DA7 and VA11's phasic  
15 relationships were restored in *ubr-1; hp731* mutants (Fig. 3F-I).

16 We identified the causative mutation in *hp731* mutant animals. *hp731* harbors a  
17 causative, *lf*, and missense C184Y mutation (Methods) at the pyridoxal phosphate-  
18 binding domain in GOT-1.2 (Fig. 4A), one of the four predicted *C. elegans* glutamate-  
19 oxaloacetate transaminases (GOTs). GOT enzymes catalyze the transfer of an amino  
20 group between aspartate and  $\alpha$ -ketoglutarate ( $\alpha$ -KG) and convert them to oxaloacetate  
21 (OAA) and glutamate (48, 49) (Fig. 5A).

22 The genetic interaction between *ubr-1* and *got-1.2* is remarkably specific: *lf*  
23 mutations for other three GOT homologues did not restore bending of *ubr-1* mutants

1 (Table 2). *lf* mutations in other metabolic enzymes or transporters that may be involved in  
2 glutamate and aspartate metabolic pathways (Table 2), including the alanine  
3 aminotransferase, glutamine synthetase, and glutaminase, did not rescue *ubr-1* mutant's  
4 motor defects either. Henceforth, we refer to *got-1.2* as *got-1*.

## 5 **A critical requirement of GOT-1 activity in premotor interneurons to affect bending**

6 To determine the endogenous expression pattern of GOT-1, we generated a functional  
7 GOT-1 reporter by inserting GFP at the endogenous *got-1* locus. GOT-1::GFP exhibited  
8 cytoplasmic expression in all somatic tissues, including broad expression in the nervous  
9 system (Fig. 4B; Fig. S2B). To determine the critical cells that mediate the genetic  
10 interactions between *ubr-1* and *got-1*, we restored cell-type specific GOT-1 expression in  
11 *ubr-1; got-1* mutants, and assessed their effect on the animal's motor pattern. Restoring  
12 GOT-1 in all neurons (*Prgef-1*), but not in all muscles (*Pmyo-3*), fully reverted the motor  
13 pattern of *ubr-1; got-1* to the reduced bending as in *ubr-1* mutants (Table 1); therefore,  
14 both UBR-1 and GOT-1 function through neurons to regulate motor patterns.

15 Because GOT-1 is more broadly expressed in the nervous system than the UBR-  
16 1::GFP reporter (Fig. 4B), we examined whether GOT-1 functions through UBR-1-  
17 expressing neurons to regulate bending. Similar to our observation for neuronal sub-type  
18 UBR-1 rescue (Fig. 2), restoring GOT-1 in premotor interneurons of the reversal circuit  
19 (Table 1) was required for reversion of *ubr-1; got-1*'s bending pattern to that of *ubr-1*.  
20 Similarly, restoring GOT-1 in the same subset of these premotor interneurons, including  
21 AVE and RIM, exerted the most significant, partial reversion of *ubr-1; got-1*'s motor  
22 defects (Fig. 4D; Fig. S4).

1           Therefore, not only does a predicted metabolic enzyme GOT-1 exhibit genetic  
2 interaction with UBR-1, but also both proteins exhibit similar prominent requirement in  
3 premotor interneurons to regulate the reversal motor pattern. These results raise the  
4 possibility that metabolic dys-regulation may underlie *ubr-1*'s motor defects.

#### 5 **GOT-1 synthesizes glutamate using aspartate**

6 The catalytic activity of GOT-family transaminases enables reversible conversions  
7 between aspartate and glutamate (left panel in Fig. 5A). Their *in vivo* activity and  
8 physiological function, however, have not been examined in animal models.

9           To determine the metabolic changes associated with the loss of GOT-1, we  
10 quantified the amino acid levels of synchronized wildtype and *got-1* adults by high  
11 performance liquid chromatography (HPLC). As previously reported (50), glutamate is  
12 an abundant amino acid, whereas aspartate is maintained at a low abundance in *C.*  
13 *elegans* (upper panel in Fig. 5B). In *got-1* mutants, glutamate level exhibited a decrease  
14 of  $27.6 \pm 7.0\%$  (mean  $\pm$  SEM, n=4, P=0.0477 against wildtype animals), whereas the  
15 aspartate level exhibited a massive increase of  $27.3 \pm 4.76$  folds (n=4, P=0.0076 against  
16 wildtype animals) (lower panel in Fig. 5B; Fig. 6A, B). These results implicate that *in*  
17 *vivo*, GOT-1 preferentially synthesizes glutamate from aspartate (right panel in Fig. 5A).  
18 Among the *C. elegans* GOTs, GOT-1 appears to be the key glutamate-synthesizing  
19 enzyme, because removing its homologue, GOT-2, did not lead to glutamate reduction  
20 (Fig. 6A).

21           We noted that compared to the massive aspartate accumulation, the reduction of  
22 glutamate was mild in *got-1* mutants. This may result from compensatory activation of  
23 glutamate synthesis using other amino acids. As reported (50), alanine is the most

1 abundant amino acid in *C. elegans* (upper panel in Fig. 5B). In *got-1* mutants, alanine  
2 level exhibited a decrease of  $48.5 \pm 12.4\%$  (n=4, P=0.0050 against wildtype animals)  
3 (lower panel in Fig. 5B; Fig. 6C), supporting the notion that alanine becomes the  
4 compensatory source for glutamate when conversion from aspartate is blocked.

5       Such a drastic shift in equilibrium of the three key amino acids - aspartate,  
6 glutamate, and alanine - in *got-1* mutants must exert indirect metabolic consequences. To  
7 determine whether GOT-1's loss affects the global metabolic state, we performed liquid  
8 chromatography-mass spectrometry (LC-MS) analyses on whole worm lysates. Indeed,  
9 *got-1* mutants exhibited increased AMP/ATP and NADP/NADPH, and decreased  
10 GSH/GSSG glutathione ratios (Fig. 6E, F), two hallmark features for increased cellular  
11 toxicity and metabolic stress (51).

12       We conclude that in *C. elegans*, GOT-1 synthesizes glutamate, and maintains  
13 glutamate level using aspartate. The loss of GOT-1 leads to glutamate reduction,  
14 aspartate accumulation, and potential compensatory glutamate synthesis using other  
15 amino acids.

## 16 **Glutamate level is elevated in *ubr-1* mutants**

17 Removing the glutamate-synthesizing GOT-1 restored *ubr-1*'s bending pattern,  
18 suggesting that *ubr-1*'s motor defects may be associated with glutamate homeostasis.

19       We assessed the amino acid level in *ubr-1* mutants by HPLC. In *ubr-1* mutants, the  
20 glutamate level was increased by  $22.2 \pm 9.3\%$  (n=5, P=0.0479 against wildtype animals).  
21 In *ubr-1; got-1* mutants, similar to *got-1* mutants, the glutamate level was reduced by  
22  $21.6 \pm 2.4\%$  (n=4, P=0.0230 against wildtype animals; P=0.0153 against *ubr-1* mutants),  
23 whereas the aspartate level was increased by  $30.2 \pm 5.3$  folds (n=4, P=0.0033 against

1 wildtype animals,  $P=0.0031$  against *ubr-1* mutants) (Fig. 6A). Interestingly, there was a  
2 mild increase of aspartate in *ubr-1* mutants ( $46.3 \pm 12.4\%$ ,  $n=4$ ,  $P=0.0302$  against  
3 wildtype animals) (Fig. 6B), which may reflect a compensatory metabolic response to  
4 reduce glutamate accumulation. Reminiscent of the genetic interactions exhibited at the  
5 behavioral level, removing GOT-1's homologue, GOT-2, which did not restore *ubr-1*'s  
6 bending, did not reduce *ubr-1*'s glutamate either (Fig. 6A).

7 To determine if homeostasis of other metabolic substrates for GOT-1,  $\alpha$ -KG and  
8 OAA, also contributes to *ubr-1*'s motor defects, we surveyed their levels in *ubr-1*, *got-1*  
9 and *ubr-1; got-1* adults by LC-MS/MS. Unlike the case for glutamate, which exhibited  
10 inversely correlated changes between *ubr-1* and *got-1* mutants, and between *ubr-1* and  
11 *ubr-1; got-1* mutants, the  $\alpha$ -KG and OAA levels did not exhibit consistent, or correlated  
12 changes (Fig. 6C). These results support that restored bending in *ubr-1; got-1* animals  
13 primarily results from reduced glutamate, not from indirect - consequential or  
14 compensatory - metabolic effects that the reduced glutamate may have incurred.

### 15 **Some premotor interneurons exhibit defective morphology in *ubr-1* adults**

16 Glutamate is a neurotransmitter, as well as an abundant amino acid partaking in  
17 other metabolic pathways including amino acid synthesis, energy production and urea  
18 cycle. An elevation of glutamate level may result in not only increased neuronal signaling  
19 in glutamatergic neurons, but also cellular stress in all UBR-1-expressing cells.

20 Because most of the critically required premotor interneurons for UBR-1's role in  
21 motor pattern are cholinergic (52), the developmental effect of increased glutamate in  
22 these neurons may play a prominent role. To explore this possibility, we examined these  
23 interneurons using a transcriptional reporter (*Pnmr-1-RFP*) (18) that allows visualization

1 of their somata (Fig. 7; Fig. S6), and a translation reporter (GLR-1::GFP) (18) that labels  
2 synapses of the AVA and AVE premotor interneurons(18) (Fig. 7).

3 In adult *ubr-1* mutants, both reporters exhibited prominent and moderate decrease  
4 in fluorescence intensity in premotor interneurons AVA and AVE, respectively (Fig. 7A-  
5 D for *Pnmr-1*; E-F for GLR-1::GFP). Such a decrease was not observed for other  
6 interneurons including RIM (Fig. 7A-D). We further noted that unlike the smooth and  
7 round somata in wildtype animals (Fig. S6, wildtype), in *ubr-1* mutants, the AVA and  
8 AVE somata exhibited rough edges and short branches in L4 stage larvae and adults (Fig.  
9 S6A, L4 and Adult panels), whereas other premotor interneurons such as RIM were  
10 appeared as in wildtype animals (Fig. S6B). The late onset of reversal bending defects  
11 coincides with the morphological change in AVA and AVE becoming prominent by the  
12 end of the larval stage (Fig. S6A). Their fluorescent intensity and morphology defects  
13 were significantly rescued by restoring UBR-1 expression in premotor interneurons (Fig.  
14 7A-D; Fig. S6C), and in adult *ubr-1*; *got-1* mutants (Fig. 7A-D; Fig. S6C).

15 These results support the notion that an increased glutamate level may lead to  
16 developmental defects in *ubr-1* mutants, and premotor interneurons, in particular AVA  
17 and AVE, may be more susceptible to such a perturbation than other neurons or cells.

### 18 **GOT activity but not total protein level is increased in *ubr-1* mutants**

19 Our analyses attributed the motor defect of *ubr-1* mutants to altered glutamate  
20 metabolism, most critically from premotor interneurons. To address how UBR-1 may  
21 negatively regulates glutamate level through GOT-1, we first assayed the total GOT  
22 activity of the whole worm lysates. We observed a moderate increase of GOT activity in  
23 *ubr-1* mutants (Fig. 8A). Consistent with the presence of multiple GOT homologues, the



1 total GOT activity was drastically reduced, but not abolished in *got-1* mutants. The  
2 increased GOT activity in *ubr-1* mutants was attenuated in *ubr-1; got-1* double mutants.  
3 The attenuation effect was also specific to GOT-1: the loss of GOT-2 did not reduce  
4 GOT activity in *ubr-1* mutants (Fig. 8A).

5 An increased GOT activity is consistent with an elevated glutamate level in *ubr-1*  
6 mutants. However, we did not observe changes in GOT-1 protein level in *ubr-1* mutants.  
7 The level of GOT-1::GFP, expressed either from its endogenous locus or from an  
8 exogenous panneuronal promoter (*Prgef-1*), was similar between wildtype and *ubr-1*  
9 mutants (Fig. 8B). These results suggest that GOT-1 is not a direct substrate of UBR-1.  
10 UBR-1-mediated regulation of glutamate metabolism may involve targeting other  
11 pathway components.

## 1 **Discussion**

2 Dys-regulated E3 activities have been implicated in neurodevelopmental and  
3 neurological disorders (53). Using the *C. elegans* model and its motor output as the  
4 functional readout, we reveal a previously unknown role of UBR-1 in glutamate  
5 metabolism. The absence of UBR-1 elevates glutamate level, which promotes  
6 simultaneous activation of A-class motor neurons, leading to reduced bending during  
7 reversal movements. This defect is compensated by removing a glutamate-synthesizing  
8 enzyme and reducing glutamate level in premotor interneurons of the reversal motor  
9 circuit. Aberrant glutamate metabolism may underlie *ubr-1* mutant's physiological  
10 defects.

### 11 ***ubr-1*'s motor phenotype is associated with glutamate level change**

12 Coinciding with an elevated GOT activity, *ubr-1* mutants exhibit increased glutamate  
13 level. Removing a key glutamate-synthesizing enzyme GOT-1 reduces the glutamate  
14 level in *ubr-1* mutants. These metabolic changes parallel those in motor behaviors:  
15 removing the activity of GOT-1 enzyme restores bending in *ubr-1* mutants. These results  
16 imply that elevated glutamate level is associated with *ubr-1*'s defective bending.

17 Genetic mutations in key metabolic enzymes can exert effects beyond their  
18 primary substrates and immediate metabolic pathways. For example, upon the loss of  
19 GOT-1, the reduction of glutamate synthesis from aspartate likely induces compensatory  
20 utility of other amino acids, thus the reduction of alanine. When converting aspartate to  
21 glutamate, GOT-1 may indirectly affect the equilibrium of other substrates, OAA and  $\alpha$ -  
22 KG, metabolites that take part in multiple metabolic functions, including energy  
23 production, amino acid homeostasis, nucleotide synthesis, and lipid synthesis.

1           Our metabolomics analyses of *got-1* mutants revealed no consistent or correlated  
2 changes in the level of OAA,  $\alpha$ -KG (Fig. 6C), and all other TCA cycle metabolites from  
3 wildtype controls (Fig. S5). Because the same samples exhibited consistent and  
4 correlated changes between the aspartate, glutamate and alanine levels, the variability in  
5 other metabolite levels likely reflects flexibility of compensatory or adaptive changes in  
6 response to the primary metabolic dysfunction upon the loss of GOT-1. Indeed, the only  
7 consistent and anti-correlated metabolic change that we observed between *ubr-1* and *got-*  
8 *1* (and *ubr-1; got-1*) mutants was the glutamate level. Cumulatively, these results strongly  
9 support that the primary metabolic change - the level of glutamate - causes the motor  
10 pattern change in *ubr-1* and *ubr-1; got-1* mutants.

11           Our analyses measured glutamate level in whole animals, not the specific neuron  
12 groups that are critically required for both UBR-1 and GOT-1's effect on reversals.  
13 Examples of genes with broad expression, but cell-type specific functions have been  
14 reported (32, 54, 55). These and other results – such as the presence and requirement of  
15 both UBR-1 and GOT-1 in premotor interneurons in mediating their effects on the  
16 reversal motor pattern – suggest that the glutamate level change in premotor interneurons  
17 significantly contribute to the motor pattern change in *ubr-1* and *ubr-1; got-1* mutants.  
18 We reckon that other UBR-1-expressing neurons likely also contribute to such an  
19 alteration. Furthermore, the glutamate change in other neurons and cells may cause other  
20 physiological effects that were not examined in this study, where we only followed the  
21 most obvious motor defect.

22   **Increased glutamate may cause defective premotor interneuron development**

1           Glutamate has multiple functions. Being a key neurotransmitter itself, glutamate  
2 also serves as the sole precursor of another neurotransmitter GABA. Glutamate is also  
3 one of the abundant amino acids partaking in other metabolic pathways including amino  
4 acid synthesis, energy production and urea cycle. An elevation of glutamate not only  
5 affects signaling in glutamatergic and likely GABAergic neurons, but also increases  
6 metabolic stress in all cells.

7           Because both UBR-1 and GOT-1 exert strong effects on the reversal motor pattern  
8 through premotor interneurons, most of which cholinergic (52), the developmental effect  
9 of increased glutamate may play a prominent role in these interneurons. Indeed, we  
10 observed morphological changes of premotor interneurons that coincided with the onset  
11 of motor pattern change in *ubr-1* mutants. Interestingly, within the reversal motor circuit,  
12 premotor interneurons that exhibited the prominent changes, AVA and AVE, provide  
13 direct synaptic inputs to the A-class motor neurons. These observations suggest that  
14 compared to other cells and neurons, the development and function of premotor  
15 interneurons, in particular AVA and AVE, may be more susceptible to glutamate  
16 increase, likely through both increased glutamatergic inputs and cellular stress.

### 17 **GOT-1 is a key enzyme for glutamate homeostasis in neurons**

18 Despite its broad expression, GOT-1 can only influence *ubr-1*'s motor defects through  
19 neurons. These results indicate that maintaining glutamate level in neurons, especially the  
20 premotor interneurons, is critical for the proper motor output of *ubr-1* mutants.

21           In the mammalian brains, glutamate has to be locally synthesized because it cannot  
22 cross the blood-brain barrier (56). The activity of transaminases, mainly by GOT and  
23 ALT, establishes and maintains homeostasis of three abundant amino acids, glutamate,

1 alanine, and aspartate (57, 58). A recent study suggests that GOT also contributes to  
2 glutamate synthesis at synapses (59).

3 The main sources of glutamate synthesis and homeostasis in *C. elegans* neurons  
4 have remained elusive (60). Our study establishes GOT-1 as a key enzyme for glutamate  
5 synthesis. Further, it provides the first evidence of a critical role of GOT-1 in glutamate  
6 metabolism in the nervous system.

### 7 **Direct substrates through which UBR-1 regulates glutamate level are unknown**

8 How UBR-1 negatively regulates glutamate level remains to be elucidated. UBR family  
9 proteins are often addressed in the context of N-end rule E3 ligases (6, 7, 10). However,  
10 UBR proteins have non-N-end rule substrates, and N-end rule substrates do not account  
11 for all described functions of UBR proteins (21, 61-64), and their physiological relevance  
12 remains to be clarified.

13 For example, in mammalian cells, UBR1's N-end rule substrates include pro-  
14 apoptotic fragments (11). In *C. elegans*, the CED-3 caspase promotes apoptosis. During  
15 postembryonic development, it interacts with UBR-1 to expose the N-degron of LIN-28  
16 (10), a regulator of seam cell patterning (65) to promote its degradation. However, neither  
17 UBR-1 nor LIN-28's N-degron were essential for LIN-28's degradation (10). Removing  
18 either apoptotic regulators CED-3 or CED-4, which generates pro-apoptotic fragments, or  
19 LIN-28, neither mimic nor rescue *ubr-1* mutants' bending defects (Table 2;  
20 Supplementary Movie 3). Substrates for neuronal function of UBR-1 remain to be  
21 identified.

22 Regardless of the nature of UBR-1 targets, our results show that UBR-1 is  
23 unlikely to directly regulate GOT-1's protein stability: we did not observe a change in the

1 level of GOT-1::GFP in *ubr-1* mutants. We speculate that UBR-1-mediated regulation of  
2 glutamate level may involve targeting other components that subsequently affect  
3 glutamate metabolism. For example, the activity of many rate-limiting metabolic  
4 enzymes in glycolysis, fatty acid synthesis, cholesterol synthesis, and gluconeogenesis  
5 are regulated by phosphorylation and de-phosphorylation (66, 67). UBR-1 may mediate  
6 the ubiquitination of kinases or phosphatases that modify GOT-1's activity. A large-scale  
7 *ubr-1* suppressor screen may be required to yield insights on UBR-1's direct substrates.

### 8 **The *C. elegans* motor behavior as a model to investigate UBR1 and *JBS***

9 The UBR family proteins have been extensively examined in yeast, cultured cells, and  
10 mouse models, but only recently in *C. elegans*. In yeast, UBR1 affects cell cycle  
11 progression, but is non-essential (6). Mouse models revealed the functional redundancy  
12 of multiple UBR homologues, where combinatorial knockout of UBR1 and UBR2 results  
13 in embryonic lethality (12). *C. elegans* UBR1 affects the stability of LIN-28, a regulator  
14 of postembryonic hypoderm seam cell division (10); both UBR1 and LIN-28 are non-  
15 essential for viability. The simplicity and viability of the *C. elegans ubr-1* model has  
16 allowed us to reveal, and genetically dissect a previously unknown physiological role of  
17 UBR-1 in glutamate homeostasis. We note that aberrant glutamate metabolism may cause  
18 systemic cellular and other unexamined neuronal defects in *ubr-1* mutants. However, the  
19 simplicity and sensitivity of the *C. elegans* premotor interneuron circuit, and the  
20 prominent motor pattern change provided a quantifiable functional readout to afford  
21 genetic pathway dissection.

22 Our study provides the first demonstration of a UBR protein's physiological role in  
23 glutamate regulation. We noted with interest that in a case study of a *JBS* patient with

1 severe cognitive impairments, GOT activity levels, used as a biomarker of inflammation,  
2 were increased (68). In addition to its role in development, there is a growing body of  
3 evidence for glutamate signaling in non-neuronal tissues (48, 69, 70). It will be of interest  
4 to examine whether glutamate level and signaling in other *JBS* animal models and *JBS*  
5 patients are aberrant, and whether they contribute to *JBS* pathophysiology.

## 1 **Methods**

### 2 **Strains and constructs**

3 Strains: See Tables 1, 2 and S1 for a complete strain list generated in this study. All *C.*  
4 *elegans* were cultured on standard NGM plates seeded with OP50, and maintained at  
5 22°C.

6 *hp684* and *hp731* were isolated by EMS mutagenesis. They were mapped using  
7 SNP mapping and whole genome sequencing (71, 72), followed by behavioral rescue  
8 using fosmids and genomic fragments that harbor *ubr-1* and *got-1.2*, respectively. Placing  
9 *hp731* over a deficiency *mnDf1* fully recapitulated the rescuing effect in the *ubr-1* mutant  
10 background, confirming that *hp731* being a *lf* allele of *got-1.2* (Table 2). *hp820*, *hp821*,  
11 *hp820hp833* and *hp865* were generated by CRISPR-Cas9-mediated genome editing,  
12 following protocols described in (26). The rest of genetic mutants were obtained from  
13 CGC; all strains were backcrossed at least four times against N2 by genotyping.

14 Transgenic strains include those with extra-chromosomal multi-copy arrays  
15 (*hpEx*), integrated multi-copy arrays (*hpIs*), single-copy integrated arrays (*hpSi*), and a  
16 *got-1.2* GFP knock-in allele (*hp*). Transgenic animals carrying extra-chromosomal arrays  
17 (*hpEx*) were created by co-injecting the DNA plasmid of interest and a co-injection  
18 marker at 5-30 ng/μL. Extra-chromosomal arrays were integrated into the genome using  
19 UV irradiation to create stable, transgenic lines (*hpIs*) (73). We found that GOT-1  
20 overexpression rendered sick animals. Hence, all *got-1* tissue-specific rescue lines were  
21 generated using Mos1-mediated single copy insertion (*hpSi*) as previously described (74).  
22 All integrated strains were outcrossed several times against N2 prior to phenotypic  
23 analyses.



1 GOT-1.2::GFP knock-in: The in-frame GOT-1 C-terminal GFP fusion allele (*hp881*) was  
2 generated by CRISPR-Cas9 mediated homologous recombination, following protocols  
3 described in (75). The replacement template for GOT-1::GFP (pJH3629) includes 1kb  
4 sequence upstream to the *got-1* start codon, the entire *got-1* coding sequence, and 1.5kb  
5 sequence downstream of the *got-1* stop codon. GFP was inserted in-frame after the last  
6 amino acid of GOT-1. A LoxP-Prps-27-NeoR-loxP cassette was inserted between the  
7 stop codon and 3' UTR. After injection, animals were allowed to lay eggs overnight at  
8 25<sup>0</sup>C before G418 selection. Animals with extra-chromosomal arrays were selected  
9 against as described. Candidates for insertion were confirmed by genotyping and  
10 sequencing. Confirmed insertion lines were injected with a *Pelt-3::Cre* plasmid to  
11 remove the LoxP cassette. The resulting *hp881* allele was outcrossed against N2 wildtype  
12 animals twice before crossed into the *ubr-1* mutants.

### 13 **Locomotion Analysis**

14 Plate conditions: When transferred to a new, thinly seeded plate, *C. elegans* typically  
15 spend most of the time moving forward, with brief interruptions of backward movement.  
16 As previously described (42), 35 mm NGM plates with limited food (lightly seeded OP50  
17 bacteria) were used for automated tracking and behavioral analyses. Here we quantified  
18 body curvature, initiation frequency, and duration on one-day old young adults using  
19 copper chloride (CuCl<sub>2</sub>), an aversive stimulus for *C. elegans* (76). Briefly, immediately  
20 before transferring worms onto the NGM plates, a ~10-20 µl of 100 mM CuCl<sub>2</sub> solution  
21 was pipetted into a small circle (~20 mm in diameter) in the middle of the plate for the  
22 animal to roam. One animal was placed in the center of the circle and allowed to  
23 habituate for one minute prior to recording for three minutes. For the next recording,

1 CuCl<sub>2</sub> was pipetted onto the same circle before another animal was placed on the plate  
2 and recorded. For all data presented in the same graph, animals were recorded on the  
3 same day, with at least one animal from each genotype recorded on the same plate. We  
4 altered the order of recording for animals of different genotype.

5 Tracking and data analysis: Behavior was recorded using a Zeiss Axioskop 2 Plus  
6 equipped with an ASI MS-40000 motorized stage and a CCD camera (Hamamatsu Orca-  
7 R2). Tracking and analysis were performed using Micromanager and Image J software  
8 plug-ins developed in-house (courtesy of Dr. Taizo Kawano). Image sequences were  
9 sampled at 100-msec exposure (10 frames per second). For the post-imaging analysis, an  
10 Image J plug-in was used to skeletonize the worm and extract its centerline. The  
11 centerline was divided into 29 equal segments, and the angle between each segment and  
12 its tangent line was calculated to quantify the curvature of the animal. These segments  
13 were binned into four groups to capture the most consistent curvature trends across the  
14 entire length of the animal. The directionality of movement (forward vs. backward) was  
15 determined by first identifying the anterior-posterior axis or the “head” and “tail” points,  
16 which was manually defined at the first two frames and verified throughout the recording.  
17 To calculate directionality of movement, the displacement of the midline point in relation  
18 to the head and tail for each worm was determined based on its position in the field-of-  
19 view and the stage coordinates. Image sequences wherein animals touched the edge of the  
20 recording field and crossed over on themselves were not processed.

21 Quantification: Analyses of the output data were carried out using an R program-based  
22 code developed in-house (courtesy of Dr. Michelle Po). From a group of recordings  
23 ( $N \geq 10$  for each genotype per experiment), we quantified the following parameters,

1 among other behavioral parameters analyzed by the program: 1) Curvature, the average  
2 curvature of each animal at each segment; 2) Initiation (defined as the frequency of  
3 directional change for each animal; 3) Duration (defined as the time spent moving in the  
4 same direction for >3 frames or 300msec, calculated for each bout of forward or  
5 backward initiation). Body curvature, initiations, and durations were calculated for  
6 forward and backward locomotion separately.

### 7 **The A-class motor neuron calcium imaging and analysis**

8 Animals of various genotypes were crossed into a reporter *hplIs460* (*Punc-4-*  
9 *GCaMP6::wCherry*), using a calcium reporter GCaMP6 fused in-frame at its C-terminus  
10 with wCherry for both tracking and ratiometric correction for motion artifacts in moving  
11 animals during recordings (46). A-MN imaging in moving young adults was carried out  
12 as described previously (32). Briefly, *C. elegans* were placed on a 2.5% agar pad,  
13 immersed in a few drops of M9 buffer, and covered by a coverslip to allow slow  
14 crawling. Each recording lasted for 3 minutes. Images were captured using a 40x  
15 objective on a Zeiss Axioskop 2 Plus equipped with an ASI MS-40000 motorized stage, a  
16 dual-view beam splitter (Photometrics) and a CCD camera (Hamamatsu Orca-R2). The  
17 fluorescence excitation light source from X-CITE (EXFO Photonic Solution Inc.) was  
18 reduced to prevent saturation of imaging field. The fluorescent images were split by  
19 Dual-View with a GFP/RFP filter set onto the CCD camera operated by Micromanager.  
20 The 4x-binned images were obtained at 50-msec exposure time (10 frames per second).  
21 Regions of interest (ROIs), containing the soma of DA7, VA10 and VA11, were defined  
22 and simultaneously tracked using an in-house developed Image J plug-in (32). The ratio  
23 between GFP and RFP fluorescence intensities from individual ROI was plotted over

1 time to produce index for calcium profile for each neuron. Displacement for the DA7  
2 soma, which exhibited the strongest RFP signal, was plotted over time to generate the  
3 example instantaneous velocity profiles. For example velocity profiles, we also manually  
4 annotated videos to verify the reversal periods. Reversal events longer than 5 seconds  
5 were used for cross-correlation analyses shown in the example traces.

6 The pair-wise phase relationships between the activity patterns of A-MNs during  
7 each reversal event were assessed by cross-correlation analyses. In each example trace,  
8 cross-correlation during the entire period of reversal was calculated to determine the  
9 phase lags between the calcium signals of VA11, DA7, and VA10. The maximum of the  
10 cross-correlation function denotes the time point when the two signals are best aligned;  
11 the corresponding argument of the maximum correlation values denotes the lag between  
12 the two neurons. The absolute time lags were used to represent the synchrony of VA11,  
13 DA7 and VA10's activation.  $N (\geq 10)$  refers to the number of reversal events analyzed for  
14 each genotype per experiment.

### 15 ***C. elegans* metabolomics analyses by HPLC and LC-MS/MS**

16 Synchronized last-stage larval worms were grown on 100 mm NGM agar plates seeded  
17 with OP50 bacteria. Worms were collected using M9 buffer and were washed thoroughly  
18 to remove bacteria. Worm pellets were snap-frozen in liquid nitrogen and pulverized  
19 using a cell crusher. Amino acids and other metabolites were extracted by addition of ice-  
20 cold extraction solvent (40% acetonitrile, 40% methanol, and 20% water) and incubated  
21 on dry ice for an hour with occasional thawing and vortexing. Samples were then moved  
22 to a thermo mixer (Eppendorf) and shook for an hour at 4°C at 1400 rpm. These samples  
23 were centrifuged at 14000 rpm for 10 min at 4°C. Supernatant was transferred to fresh

1 tubes and lyophilized in a CentreVap concentrator (Labconco) at 4°C. Samples were  
2 stored at –80 °C until used for HPLC or LC-MS/MS analyses.

3 Amino acid quantitation was performed using the Waters Pico-Tag System  
4 (Waters). After hydrolysis and pre-column derivatization of the sample by PITC, samples  
5 were analyzed by reverse phase HPLC (Amino acid facility, SPARC BioCentre, Sick  
6 Kids, Toronto, Canada). LC-MS/MS metabolite analysis was performed as described  
7 previously (77). Raw values were normalized against the total protein concentration as  
8 determined by a Bradford Protein Assay (Bio-Rad). Results were compared from at least  
9 three sets of independent experiments ( $N \geq 3$ ), with all samples collected and analyzed in  
10 parallel in each replica.

#### 11 **Measurement of total GOT Activity from the *C. elegans* lysate**

12 Synchronized late L4 larval stage worms were grown on 100 mm NGM agar plates  
13 seeded with OP50 bacteria. Worms were collected using M9 buffer and were washed  
14 thoroughly to remove bacterial contamination. Samples were homogenized by sonication  
15 in 100-200ul ice-cold AST buffer. Samples were centrifuged at 13,000g for 10 minutes to  
16 remove insoluble materials. The supernatant was used for the AST assay and pellets were  
17 used to quantify the total protein in the samples (as described above).

18 GOT (also referred to as AST) activity was measured using a colorimetric assay  
19 with AST Activity Assay Kit (Sigma-Aldrich) according to the manufacturer's  
20 instructions. Data were normalized by the total protein content of the whole worm lysate  
21 as determined by a Bradford Protein Assay.

#### 22 ***C. elegans* Biochemistry**

1 Mixed stage *C. elegans* were grown on 100 mm NGM plates seeded with OP50 and  
2 collected using M9 buffer. Lysates were prepared as described previously (78). For  
3 western blot analyses, total protein concentration was determined using a Bradford  
4 Protein Assay (Bio-Rad). Anti-GFP antibodies (Roche) were used to probe for GOT-  
5 1::GFP and tubulin was used for the loading control.

## 6 **Statistical Analysis**

7 For bending curvature and calcium imaging analyses, statistical significance was  
8 determined using the Kruskal-Wallis test and the two-way repeated measures (RM)  
9 ANOVA and subsequent post-hoc analysis. For metabolite analyses, two-tailed Student's  
10 t-tests were applied to determine statistical differences.  $p < 0.05$  were considered to be  
11 statically significant. All statistics were performed using Prism software (GraphPad).

## 12 **Acknowledgements**

13 We thank Asuka Guan, Josh Kaplan, Gene Knockout Consortium and National  
14 Bioresource Project and *Caenorhabditis elegans* Center (CGC) (funded by NIH Office of  
15 Research Infrastructure Programs P40 OD010440) for strains, Reynaldo Interior for the  
16 HPLC analyses, Don Moerman and Stephen Flibotte for the whole-genome sequencing  
17 analyses, Amy Caudy for advice on the metabolomics analyses. We thank Taizo Kawano,  
18 Michelle Po, Valeriya Laskova, and Asuka Guan for technical and programming support.  
19 We thank Aravinthan Samuel and Andrew Chisholm for comments on the manuscript.

## 1 References

- 2 1. Pickart CM, Eddins MJ. Ubiquitin: structures, functions, mechanisms. *Biochim*  
3 *Biophys Acta*. 2004;1695(1-3):55-72.
- 4 2. Schwarz LA, Patrick GN. Ubiquitin-dependent endocytosis, trafficking and  
5 turnover of neuronal membrane proteins. *Mol Cell Neurosci*. 2012;49(3):387-93.
- 6 3. Ciechanover A, Iwai K. The ubiquitin system: from basic mechanisms to the  
7 patient bed. *IUBMB Life*. 2004;56(4):193-201.
- 8 4. Ciechanover A, Orian A, Schwartz AL. Ubiquitin-mediated proteolysis:  
9 biological regulation via destruction. *Bioessays*. 2000;22(5):442-51.
- 10 5. Hershko A, Ciechanover A. The ubiquitin system. *Annu Rev Biochem*.  
11 1998;67:425-79.
- 12 6. Varshavsky A. The N-end rule: functions, mysteries, uses. *Proc Natl Acad Sci U*  
13 *S A*. 1996;93(22):12142-9.
- 14 7. Sriram SM, Kim BY, Kwon YT. The N-end rule pathway: emerging functions  
15 and molecular principles of substrate recognition. *Nat Rev Mol Cell Biol*.  
16 2011;12(11):735-47.
- 17 8. Rao H, Uhlmann F, Nasmyth K, Varshavsky A. Degradation of a cohesin subunit  
18 by the N-end rule pathway is essential for chromosome stability. *Nature*.  
19 2001;410(6831):955-9.
- 20 9. Stolz A, Besser S, Hottmann H, Wolf DH. Previously unknown role for the  
21 ubiquitin ligase Ubr1 in endoplasmic reticulum-associated protein degradation. *Proc Natl*  
22 *Acad Sci U S A*. 2013;110(38):15271-6.
- 23 10. Weaver BP, Weaver YM, Mitani S, Han M. Coupled Caspase and N-End Rule  
24 Ligase Activities Allow Recognition and Degradation of Pluripotency Factor LIN-28  
25 during Non-Apoptotic Development. *Dev Cell*. 2017;41(6):665-73 e6.
- 26 11. Piatkov KI, Brower CS, Varshavsky A. The N-end rule pathway counteracts cell  
27 death by destroying proapoptotic protein fragments. *Proc Natl Acad Sci U S A*.  
28 2012;109(27):E1839-47.
- 29 12. An JY, Seo JW, Tasaki T, Lee MJ, Varshavsky A, Kwon YT. Impaired  
30 neurogenesis and cardiovascular development in mice lacking the E3 ubiquitin ligases  
31 UBR1 and UBR2 of the N-end rule pathway. *Proc Natl Acad Sci U S A*.  
32 2006;103(16):6212-7.
- 33 13. Zenker M, Mayerle J, Lerch MM, Tagariello A, Zerres K, Durie PR, et al.  
34 Deficiency of UBR1, a ubiquitin ligase of the N-end rule pathway, causes pancreatic  
35 dysfunction, malformations and mental retardation (Johanson-Blizzard syndrome). *Nat*  
36 *Genet*. 2005;37(12):1345-50.
- 37 14. Hwang CS, Sukalo M, Batygin O, Addor MC, Brunner H, Aytes AP, et al.  
38 Ubiquitin ligases of the N-end rule pathway: assessment of mutations in UBR1 that cause  
39 the Johanson-Blizzard syndrome. *PLoS One*. 2011;6(9):e24925.
- 40 15. Ottersen OP, Storm-Mathisen J. Glutamate- and GABA-containing neurons in the  
41 mouse and rat brain, as demonstrated with a new immunocytochemical technique. *J*  
42 *Comp Neurol*. 1984;229(3):374-92.
- 43 16. Mattson MP. Glutamate and neurotrophic factors in neuronal plasticity and  
44 disease. *Ann N Y Acad Sci*. 2008;1144:97-112.
- 45 17. DiAntonio A. Glutamate receptors at the *Drosophila* neuromuscular junction. *Int*  
46 *Rev Neurobiol*. 2006;75:165-79.

- 1 18. Brockie PJ, Maricq AV. Ionotropic glutamate receptors in *Caenorhabditis*  
2 *elegans*. *Neurosignals*. 2003;12(3):108-25.
- 3 19. Dong XX, Wang Y, Qin ZH. Molecular mechanisms of excitotoxicity and their  
4 relevance to pathogenesis of neurodegenerative diseases. *Acta Pharmacol Sin*.  
5 2009;30(4):379-87.
- 6 20. Siegel S, Sanacora G. The roles of glutamate receptors across major neurological  
7 and psychiatric disorders. *Pharmacol Biochem Behav*. 2012;100(4):653-5.
- 8 21. Tasaki T, Mulder LC, Iwamatsu A, Lee MJ, Davydov IV, Varshavsky A, et al. A  
9 family of mammalian E3 ubiquitin ligases that contain the UBR box motif and recognize  
10 N-degrons. *Mol Cell Biol*. 2005;25(16):7120-36.
- 11 22. Xie Y, Varshavsky A. The E2-E3 interaction in the N-end rule pathway: the  
12 RING-H2 finger of E3 is required for the synthesis of multiubiquitin chain. *EMBO J*.  
13 1999;18(23):6832-44.
- 14 23. Berndsen CE, Wolberger C. New insights into ubiquitin E3 ligase mechanism.  
15 *Nat Struct Mol Biol*. 2014;21(4):301-7.
- 16 24. Budhidarmo R, Nakatani Y, Day CL. RINGs hold the key to ubiquitin transfer.  
17 *Trends Biochem Sci*. 2012;37(2):58-65.
- 18 25. Hatakeyama S, Yada M, Matsumoto M, Ishida N, Nakayama KI. U box proteins  
19 as a new family of ubiquitin-protein ligases. *J Biol Chem*. 2001;276(35):33111-20.
- 20 26. Friedland AE, Tzur YB, Esvelt KM, Colaiacovo MP, Church GM, Calarco JA.  
21 Heritable genome editing in *C. elegans* via a CRISPR-Cas9 system. *Nat Methods*.  
22 2013;10(8):741-3.
- 23 27. Sukalo M, Fiedler A, Guzman C, Spranger S, Addor MC, McHeik JN, et al.  
24 Mutations in the human UBR1 gene and the associated phenotypic spectrum. *Human*  
25 *Mutation*. 2014;35(5):521-31.
- 26 28. Brockie PJ, Mellem JE, Hills T, Madsen DM, Maricq AV. The *C. elegans*  
27 glutamate receptor subunit NMR-1 is required for slow NMDA-activated currents that  
28 regulate reversal frequency during locomotion. *Neuron*. 2001;31(4):617-30.
- 29 29. Maricq AV, Peckol E, Driscoll M, Bargmann CI. Mechanosensory signalling in  
30 *C. elegans* mediated by the GLR-1 glutamate receptor. *Nature*. 1995;378(6552):78-81.
- 31 30. Brockie PJ, Madsen DM, Zheng Y, Mellem J, Maricq AV. Differential expression  
32 of glutamate receptor subunits in the nervous system of *Caenorhabditis elegans* and their  
33 regulation by the homeodomain protein UNC-42. *J Neurosci*. 2001;21(5):1510-22.
- 34 31. Chalfie M, Sulston JE, White JG, Southgate E, Thomson JN, Brenner S. The  
35 neural circuit for touch sensitivity in *Caenorhabditis elegans*. *J Neurosci*. 1985;5(4):956-  
36 64.
- 37 32. Kawano T, Po MD, Gao S, Leung G, Ryu WS, Zhen M. An imbalancing act: gap  
38 junctions reduce the backward motor circuit activity to bias *C. elegans* for forward  
39 locomotion. *Neuron*. 2011;72(4):572-86.
- 40 33. Wicks SR, Roehrig CJ, Rankin CH. A dynamic network simulation of the  
41 nematode tap withdrawal circuit: predictions concerning synaptic function using  
42 behavioral criteria. *J Neurosci*. 1996;16(12):4017-31.
- 43 34. White JG, Southgate E, Thomson JN, Brenner S. The structure of the ventral  
44 nerve cord of *Caenorhabditis elegans*. *Philos Trans R Soc Lond B Biol Sci*.  
45 1976;275(938):327-48.



- 1 35. Gray JM, Hill JJ, Bargmann CI. A circuit for navigation in *Caenorhabditis*  
2 *elegans*. *Proc Natl Acad Sci U S A*. 2005;102(9):3184-91.
- 3 36. Alkema MJ, Hunter-Ensor M, Ringstad N, Horvitz HR. Tyramine Functions  
4 independently of octopamine in the *Caenorhabditis elegans* nervous system. *Neuron*.  
5 2005;46(2):247-60.
- 6 37. Faumont S, Rondeau G, Thiele TR, Lawton KJ, McCormick KE, Sottile M, et al.  
7 An image-free opto-mechanical system for creating virtual environments and imaging  
8 neuronal activity in freely moving *Caenorhabditis elegans*. *PLoS One*. 2011;6(9):e24666.
- 9 38. Ben Arous J, Tanizawa Y, Rabinowitch I, Chatenay D, Schafer WR. Automated  
10 imaging of neuronal activity in freely behaving *Caenorhabditis elegans*. *J Neurosci*  
11 *Methods*. 2010;187(2):229-34.
- 12 39. Chronis N, Zimmer M, Bargmann CI. Microfluidics for in vivo imaging of  
13 neuronal and behavioral activity in *Caenorhabditis elegans*. *Nat Methods*. 2007;4(9):727-  
14 31.
- 15 40. Piggott BJ, Liu J, Feng Z, Wescott SA, Xu XZ. The neural circuits and synaptic  
16 mechanisms underlying motor initiation in *C. elegans*. *Cell*. 2011;147(4):922-33.
- 17 41. Zheng Y, Brockie PJ, Mellem JE, Madsen DM, Maricq AV. Neuronal control of  
18 locomotion in *C. elegans* is modified by a dominant mutation in the GLR-1 ionotropic  
19 glutamate receptor. *Neuron*. 1999;24(2):347-61.
- 20 42. Gao S, Xie L, Kawano T, Po MD, Guan S, Zhen M. The NCA sodium leak  
21 channel is required for persistent motor circuit activity that sustains locomotion. *Nat*  
22 *Commun*. 2015;6:6323.
- 23 43. Liu P, Chen B, Mailler R, Wang ZW. Antidromic-rectifying gap junctions  
24 amplify chemical transmission at functionally mixed electrical-chemical synapses. *Nat*  
25 *Commun*. 2017;8:14818.
- 26 44. Haspel G, O'Donovan MJ, Hart AC. Motoneurons dedicated to either forward or  
27 backward locomotion in the nematode *Caenorhabditis elegans*. *J Neurosci*.  
28 2010;30(33):11151-6.
- 29 45. White JG, Southgate E, Thomson JN, Brenner S. The structure of the nervous  
30 system of the nematode *Caenorhabditis elegans*. *Philos Trans R Soc Lond B Biol Sci*.  
31 1986;314(1165):1-340.
- 32 46. Lim MA, Chitturi J, Laskova V, Meng J, Findeis D, Wiekenberg A, et al.  
33 Neuroendocrine modulation sustains the *C. elegans* forward motor state. *Elife*. 2016;5.
- 34 47. Gao S, Guan SA, Fouad AD, Meng J, Kawano T, Huang Y-C, et al. Excitatory  
35 Motor Neurons are Local Oscillators for Reverse Locomotion. *Elife*. 2017;in press.
- 36 48. Hayashi M, Yamada H, Uehara S, Morimoto R, Muroyama A, Yatsushiro S, et al.  
37 Secretory granule-mediated co-secretion of L-glutamate and glucagon triggers  
38 glutamatergic signal transmission in islets of Langerhans. *J Biol Chem*.  
39 2003;278(3):1966-74.
- 40 49. Hirotsu K, Goto M, Okamoto A, Miyahara I. Dual substrate recognition of  
41 aminotransferases. *Chem Rec*. 2005;5(3):160-72.
- 42 50. Falk MJ, Zhang Z, Rosenjack JR, Nissim I, Daikhin E, Nissim I, et al. Metabolic  
43 pathway profiling of mitochondrial respiratory chain mutants in *C. elegans*. *Mol Genet*  
44 *Metab*. 2008;93(4):388-97.

- 1 51. Son J, Lyssiotis CA, Ying H, Wang X, Hua S, Ligorio M, et al. Glutamine  
2 supports pancreatic cancer growth through a KRAS-regulated metabolic pathway.  
3 *Nature*. 2013;496(7443):101-5.
- 4 52. Serrano-Saiz E, Poole RJ, Felton T, Zhang F, De La Cruz ED, Hobert O. Modular  
5 control of glutamatergic neuronal identity in *C. elegans* by distinct homeodomain  
6 proteins. *Cell*. 2013;155(3):659-73.
- 7 53. Kelly A, Stanley CA. Disorders of glutamate metabolism. *Ment Retard Dev*  
8 *Disabil Res Rev*. 2001;7(4):287-95.
- 9 54. Schild LC, Zbinden L, Bell HW, Yu YV, Sengupta P, Goodman MB, et al. The  
10 balance between cytoplasmic and nuclear CaM kinase-1 signaling controls the operating  
11 range of noxious heat avoidance. *Neuron*. 2014;84(5):983-96.
- 12 55. Starich TA, Xu J, Skerrett IM, Nicholson BJ, Shaw JE. Interactions between  
13 innexins UNC-7 and UNC-9 mediate electrical synapse specificity in the *Caenorhabditis*  
14 *elegans* locomotory nervous system. *Neural Dev*. 2009;4:16.
- 15 56. Hawkins RA. The blood-brain barrier and glutamate. *Am J Clin Nutr*.  
16 2009;90(3):867S-74S.
- 17 57. Palmada M, Centelles JJ. Excitatory amino acid neurotransmission. Pathways for  
18 metabolism, storage and reuptake of glutamate in brain. *Front Biosci*. 1998;3:d701-18.
- 19 58. McKenna MC. The glutamate-glutamine cycle is not stoichiometric: fates of  
20 glutamate in brain. *J Neurosci Res*. 2007;85(15):3347-58.
- 21 59. Takeda K, Ishida A, Takahashi K, Ueda T. Synaptic vesicles are capable of  
22 synthesizing the VGLUT substrate glutamate from alpha-ketoglutarate for vesicular  
23 loading. *J Neurochem*. 2012;121(2):184-96.
- 24 60. Hobert O. The neuronal genome of *Caenorhabditis elegans*. *WormBook*. 2013:1-  
25 106.
- 26 61. Takeda K, Yanagida M. Regulation of nuclear proteasome by Rhp6/Ubc2 through  
27 ubiquitination and destruction of the sensor and anchor Cut8. *Cell*. 2005;122(3):393-405.
- 28 62. Turner GC, Du F, Varshavsky A. Peptides accelerate their uptake by activating a  
29 ubiquitin-dependent proteolytic pathway. *Nature*. 2000;405(6786):579-83.
- 30 63. Kitamura K, Katayama S, Dhut S, Sato M, Watanabe Y, Yamamoto M, et al.  
31 Phosphorylation of Mei2 and Ste11 by Pat1 kinase inhibits sexual differentiation via  
32 ubiquitin proteolysis and 14-3-3 protein in fission yeast. *Dev Cell*. 2001;1(3):389-99.
- 33 64. Sasaki T, Kojima H, Kishimoto R, Ikeda A, Kunitomo H, Nakajima K.  
34 Spatiotemporal regulation of c-Fos by ERK5 and the E3 ubiquitin ligase UBR1, and its  
35 biological role. *Mol Cell*. 2006;24(1):63-75.
- 36 65. Moss EG, Lee RC, Ambros V. The cold shock domain protein LIN-28 controls  
37 developmental timing in *C. elegans* and is regulated by the *lin-4* RNA. *Cell*.  
38 1997;88(5):637-46.
- 39 66. Humphrey SJ, James DE, Mann M. Protein Phosphorylation: A Major Switch  
40 Mechanism for Metabolic Regulation. *Trends Endocrinol Metab*. 2015;26(12):676-87.
- 41 67. Oliveira AP, Ludwig C, Picotti P, Kogadeeva M, Aebersold R, Sauer U.  
42 Regulation of yeast central metabolism by enzyme phosphorylation. *Mol Syst Biol*.  
43 2012;8:623.
- 44 68. Fallahi GH, Sabbaghian M, Khalili M, Parvaneh N, Zenker M, Rezaei N. Novel  
45 UBR1 gene mutation in a patient with typical phenotype of Johanson-Blizzard syndrome.  
46 *Eur J Pediatr*. 2011;170(2):233-5.

- 1 69. Gammelsaeter R, Coppola T, Marcaggi P, Storm-Mathisen J, Chaudhry FA,  
2 Attwell D, et al. A role for glutamate transporters in the regulation of insulin secretion.  
3 PLoS One. 2011;6(8):e22960.
- 4 70. Jenstad M, Chaudhry FA. The Amino Acid Transporters of the  
5 Glutamate/GABA-Glutamine Cycle and Their Impact on Insulin and Glucagon Secretion.  
6 Front Endocrinol (Lausanne). 2013;4:199.
- 7 71. Davis MW, Hammarlund M. Single-nucleotide polymorphism mapping. Methods  
8 Mol Biol. 2006;351:75-92.
- 9 72. Doitsidou M, Poole RJ, Sarin S, Bigelow H, Hobert O. *C. elegans* mutant  
10 identification with a one-step whole-genome-sequencing and SNP mapping strategy.  
11 PLoS One. 2010;5(11):e15435.
- 12 73. Mello CC, Kramer JM, Stinchcomb D, Ambros V. Efficient gene transfer in  
13 *C. elegans*: extrachromosomal maintenance and integration of transforming sequences.  
14 Embo j. 1991;10(12):3959-70.
- 15 74. Frokjaer-Jensen C, Davis MW, Hopkins CE, Newman BJ, Thummel JM, Olesen  
16 SP, et al. Single-copy insertion of transgenes in *Caenorhabditis elegans*. Nat Genet.  
17 2008;40(11):1375-83.
- 18 75. Tzur YB, Friedland AE, Nadarajan S, Church GM, Calarco JA, Colaiacovo MP.  
19 Heritable custom genomic modifications in *Caenorhabditis elegans* via a CRISPR-Cas9  
20 system. Genetics. 2013;195(3):1181-5.
- 21 76. Hilliard MA, Bargmann CI, Bazzicalupo P. *C. elegans* responds to chemical  
22 repellents by integrating sensory inputs from the head and the tail. Curr Biol.  
23 2002;12(9):730-4.
- 24 77. Abdel Rahman AM, Ryczko M, Pawling J, Dennis JW. Probing the hexosamine  
25 biosynthetic pathway in human tumor cells by multitargeted tandem mass spectrometry.  
26 ACS Chem Biol. 2013;8(9):2053-62.
- 27 78. Hung W, Hwang C, Po MD, Zhen M. Neuronal polarity is regulated by a direct  
28 interaction between a scaffolding protein, Neurabin, and a presynaptic SAD-1 kinase in  
29 *Caenorhabditis elegans*. Development. 2007;134(2):237-49.
- 30 79. Haspel G, O'Donovan MJ. A perimotor framework reveals functional  
31 segmentation in the motoneuronal network controlling locomotion in *Caenorhabditis*  
32 *elegans*. J Neurosci. 2011;31(41):14611-23.
- 33

1 **Figure legends**

2 **Figure 1. *ubr-1* mutants exhibit reduced bending during reversal locomotion**

3 A) Structure of the UBR1 family protein. Position and amino acid substitutions in *C.*  
4 *elegans* alleles are denoted in the upper panel. Nonsense mutations (red dots), frame shift  
5 mutations (blue triangles), and small in-frame deletions (green diamonds) in human  
6 UBR1 that lead to *JBS* are denoted in the lower panel. B) Consecutive images of a wild  
7 type and *ubr-1* animal during reversals (left to right panels). Wildtype animals generate  
8 sinusoidal body bends, whereas *ubr-1*(*hp684*, *hp821hp833*) animals exhibit almost no  
9 bending, which was rescued by restoring expression of UBR-1. Dots denote position of  
10 tail. Scale bar 200 $\mu$ m. C) Schematic of curvature analysis. A worm skeleton is divided  
11 into 29 segments, and relative curvature is calculated for each segment from anterior to  
12 posterior, and binned into 4 groups. D, E) In *ubr-1* mutants (grey line), bending curvature  
13 is reduced across all segments compared to wildtype (black line), and this is rescued by  
14 restoring UBR-1 expression (red line). D- *ubr-1*(*hp684*); E- *ubr-1*(*hp821hp833*). *ubr-1*  
15 mutants exhibited longer (F) reversal events, and reduced reversal initiation frequency  
16 (events/per minute) (G). \* $P < 0.05$ , \*\*  $P < 0.01$ , \*\*\* $P < 0.001$  by Two-way RM ANOVA (D,  
17 E), and by the Kruskal-Wallis test (F, G). Data are represented as mean  $\pm$  SEM.

18 **Figure 2. A critical requirement of UBR-1 in premotor interneurons during**  
19 **reversals**

20 A) The UBR-1::GFP reporter was expressed in a subset of neurons including the  
21 premotor interneurons of the reversal circuit (Premotor INs), the pharyngeal muscles, the  
22 body wall muscles, and hypodermal seam cells. Scale bar 10 $\mu$ m. B) Reduced bending in  
23 *ubr-1* mutants (grey line) was rescued by restoring UBR-1 expression in neurons (red

1 line), but not in muscles (blue line). C) Reduced bending in *ubr-1* mutants (grey line) was  
2 robustly rescued by restoring UBR-1 expression in glutamate-receptor-expressing,  
3 premotor interneurons (INs), not in cholinergic or GABAergic motor neurons (MNs). D)  
4 Among the premotor interneurons (INs), a robust rescue required UBR-1 expression  
5 AVE and RIM (red line). \*P<0.05, \*\* P<0.01, \*\*\*P<0.001 by Two-way RM ANOVA.  
6 Data are represented as mean  $\pm$  SEM.

7 **Figure 3. UBR-1 promotes body bending by preventing synchronized A motor**  
8 **neuron activation**

9 A) Diagram of connectivity of the *C. elegans* reversal motor circuit, based on (45).  
10 Hexagons and the circle denote premotor interneurons, and the A class motor neurons,  
11 respectively. Arrows and lines denote chemical and electrical synapses between neurons,  
12 respectively. B) Approximated anatomic positions of the three A class motor neurons  
13 (VA11, DA7, VA10) and their predicted ventral and dorsal muscle targets (adapted from  
14 (79). C) An example trace of simultaneous calcium imaging of three A-type motor  
15 neurons in a moving wildtype animal. Upper panel: activities of VA11, DA7, and VA10  
16 neurons, reflected by the GCaMP6/RFP signal ratio (Upper panel); Lower panel: the  
17 instantaneous velocity of the animal, reflected by the displacement of DA7 soma position  
18 (Lower panel; positive values indicate moving towards the head; negative values indicate  
19 moving towards the tail), during a period of 40s from a 3min recording. Boxed period  
20 denotes the reversal period applied for cross-correlation analyses. C') The cross-  
21 correlation of the activity profiles between VA10 and VA11 (left), VA10 and DA7  
22 (center), and DA7 and VA11 (right), respectively. Dotted vertical line denotes the lag  
23 time. D, D') An example trace of simultaneous calcium imaging (D) and cross-

1 correlation analysis (D') of VA11, DA7 and VA10 in a moving *ubr-1* animal. E, E') An  
2 example trace of simultaneous calcium imaging (E) and cross-correlation analysis (E') of  
3 VA11, DA7 and VA10 in a moving transgenic *ubr-1* mutant animal with restored UBR-  
4 1's expression in neurons that include AVE/RIM premotor interneurons. F, F') An  
5 example trace of simultaneous calcium imaging (F) and cross-correlation analysis (F') of  
6 VA11, DA7 and VA10 in a moving *ubr-1; got-1* mutant animal. G-I) The phase lags  
7 between activities of VA10 and VA11 (G), VA10 and DA7 (H), and DA7 and VA11 (I)  
8 in animals of respective genotypes. The asynchrony between VA10 and VA11 (G), and  
9 between VA10 and DA7 (H) are significantly reduced in *ubr-1* mutants compared to  
10 wildtype animals, and restored in *ubr-1* mutants by both UBR-1 expression in premotor  
11 interneurons, and the *got-1* mutation. The activation of DA7 and VA11 (I), with higher  
12 synchrony than the other two pairs in wildtype animals, was not significantly altered in  
13 *ubr-1* mutants. \*P<0.05, \*\* P<0.01, \*\*\*P<0.001 by the Kruskal-Wallis test. Horizontal  
14 lines represent mean values.

15 **Figure 4. Removing GOT-1 transaminase restores bending in *ubr-1* mutants.**

16 A) A diagram depicting the structure of GOT-1 and the molecular lesion of the *hp731*  
17 allele. B) GOT-1 is ubiquitously expressed in all somatic tissues. Scale bar 10µm. C)  
18 Mutations in *got-1* suppress motor neuron defects in *ubr-1*. D) Restoring GOT-1 in  
19 premotor INs including AVE and RIM (blue line) in *ubr-1; got-1* reverted curvature to  
20 that of *ubr-1*. \*P<0.05, \*\* P<0.01, \*\*\*P<0.001 by the Two-way RM ANOVA test. Data  
21 are represented as mean ± SEM.

22 **Figure 5. GOT-1 synthesizes glutamate from aspartate**

1 A) GOT transaminases maintain the equilibrium between glutamate and aspartate by  
2 reversible transfer of the amino group (NH<sub>2</sub>) (left panel). Results from our amino acid  
3 profiling indicates that in *C. elegans*, GOT-1 preferentially catalyzes synthesis of  
4 glutamate from aspartate (right panel). B) Free amino acid levels measured from whole  
5 animal lysates by HPLC. *got-1* mutants (Bottom panel) exhibit reduced glutamate and  
6 alanine (blue arrows), and increased aspartate, asparagine and cysteine (red arrows)  
7 compared to wildtype animals (Top panel). In order to present data of a wide range, the  
8 Y-axis utilizes three different scales at different concentration values. Consistent with  
9 glutamate being the sole precursor of GABA synthesis, GABA level was also increased  
10 in *ubr-1* mutants (blue arrow). \*P<0.05, \*\*P<0.01 by the Student T test, N: 5 replica.  
11 Data are represented as mean ± SEM.

## 12 **Figure 6. Glutamate level is elevated in *ubr-1* mutants**

13 A-C) Free amino acid measured by HPLC, normalized against total protein in the lysate.  
14 Levels in mutants were normalized to that of wildtype. A) Glutamate level was increased  
15 in *ubr-1*, but decreased in *got-1* mutants; the increase in glutamate was reversed in *ubr-1*;  
16 *got-1*, but not in *ubr-1 got-2* mutants. B) Aspartate exhibited a modest increase in *ubr-1*,  
17 but massive accumulation in *got-1* and *ubr-1; got-1* mutants. The Y-axis utilizes two  
18 different scales (0.5 to 4.0, 4.0 to 40, respectively) to accommodate vastly different  
19 values. C) Alanine was significantly decreased in both *got-1* and *ubr-1; got-1* mutants. D-  
20 F) Metabolites measured by LC-MS/MS. D) OAA were significantly decreased in all  
21 mutants; α-KG did not exhibit consistent changes. E) The ratio of AMP to ATP was  
22 increased in *got-1* and *ubr-1; got-1* whereas *ubr-1* mutants did not show significant  
23 changes. F) The ratio of NADP to NADPH was increased in *got-1* and *ubr-1; got-1*

1 mutants (left panel), while that of glutathione (GSH) to glutathione disulfide (GSSH) was  
2 decreased in both mutants (right panel). *ubr-1* mutants show no significant change in  
3 either ratio. \* $P < 0.05$ , \*\* $P < 0.01$  by the Student T test. Horizontal lines represent mean  
4 values.

5 **Figure 7. The loss of UBR-1 affects glutamate receptor expression in premotor**  
6 **interneurons AVA and AVE.**

7 A) Representative confocal images of AVA, AVE, and RIM neurons visualized with the  
8 *Pnmr-1-RFP* reporter in wildtype, *ubr-1*, and *ubr-1; got-1* adult animals, as well as in  
9 *ubr-1* mutants with restored expression of UBR-1 in neurons including AVE and RIM.  
10 Note the prominent reduction of fluorescent intensity in AVA in *ubr-1* mutants. B-D)  
11 Quantification of the fluorescent intensity in AVA, AVE and RIM (B), and relative  
12 fluorescent intensity between AVA and RIM (C) and between AVE and RIM (D), in  
13 animals with the respective genotypes denoted in A. N: more than 10 animals of each  
14 strain. \*  $P < 0.05$ , \*\*  $P < 0.01$  by the two-way ANOVA test. E) Representative confocal  
15 images of the GLR-1::GFP signals along the AVA and AVE neurites in the ventral nerve  
16 cords of animals with the same genotypes as denoted in panel A. *ubr-1* mutants exhibited  
17 a marked decrease in fluorescent intensity. F) Quantification of the total GLR-1::GFP  
18 intensity along the AVA and AVE ventral cord neurites. N=10-15, \* $P < 0.05$ , \*\* $P < 0.01$ ,  
19 \*\*\* $P < 0.001$  by the Kruskal-Wallis test. Data are represented as mean  $\pm$  SEM. Scale bar,  
20 5  $\mu\text{m}$ .

21 **Figure 8. GOT-1 is not a direct substrate of UBR-1**

22 A) The total GOT transaminase activity was increased in *ubr-1* and *ubr-1got-2* mutants,  
23 but decreased in *got-1* and *ubr-1; got-1* mutants. \* $P < 0.05$ ; \*\* $P < 0.01$  by the Kruskal-



1 Wallis test. Horizontal lines represent the mean values. B) The loss of *ubr-1* did not lead  
2 to changes in GOT-1::GFP protein levels in *C. elegans* carrying endogenously fused  
3 GOT-1::GFP (left panel) or GOT-1::GFP driven by an exogenous pan-neuronal promoter  
4 (right panel). C) A working model of UBR-1-mediated negative regulation of glutamate  
5 level and bending.

1 **Tables**

2 **Table 1. The effect of restored expression of UBR-1 and GOT-1 on *ubr-1* and *ubr-1*;**  
 3 ***got-1*'s reversal motor pattern.**

| Background                     | Constructs (transgenes) | Tissues with restored expression                                    | Reversals |
|--------------------------------|-------------------------|---------------------------------------------------------------------|-----------|
| <i>ubr-1</i>                   | -                       | -                                                                   | -         |
|                                | <i>Pubr-1::UBR-1</i>    | neurons, muscles, seam cells                                        | +++       |
|                                | <i>Prgef-1::UBR-1</i>   | all neurons                                                         | +++       |
|                                | <i>Pmyo-3::UBR-1</i>    | Muscles                                                             | -         |
|                                | <i>Pglr-1::UBR-1</i>    | premotor INs (AVA, <b>AVE</b> , <b>RIM</b> , AVD, PVC, AVB); others | +++       |
|                                | <i>Pnmr-1::UBR-1</i>    | premotor INs (AVA, <b>AVE</b> , <b>RIM</b> , AVD, PVC); others      | +++       |
|                                | <i>Popt-3::UBR-1</i>    | premotor INs ( <b>AVE</b> , <b>RIM</b> ); others                    | +++       |
|                                | <i>Prig-3::UBR-1</i>    | premotor INs (AVA); others                                          | +         |
|                                | <i>Pgcy-13::UBR-1</i>   | premotor INs (RIM)                                                  | -         |
|                                | <i>Punc-47::UBR-1</i>   | GABAergic MNs                                                       | -         |
|                                | <i>Pacr-2::UBR-1</i>    | cholinergic MNs; others                                             | -         |
|                                | <i>Plgc-55::UBR-1</i>   | premotor INs (AVB); others                                          | -         |
|                                | <i>Pttx-3::UBR-1</i>    | INs (AIY)                                                           | -         |
|                                | <i>Pinx-1::UBR-1</i>    | INs (AIB)                                                           | -         |
| <i>ubr-1</i> ;<br><i>got-1</i> | -                       | -                                                                   | +++       |
|                                | <i>Prgef-1::GOT-1</i>   | all neurons                                                         | -         |
|                                | <i>Pglr-1::GOT-1</i>    | premotor INs (AVA, <b>AVE</b> , <b>RIM</b> , AVD, PVC, AVB); others | -         |
|                                | <i>Popt-3::GOT-1</i>    | premotor INs ( <b>AVE</b> , <b>RIM</b> ); others                    | -         |
|                                | <i>Prig-3::GOT-1</i>    | premotor INs (AVA); others                                          | +         |
|                                | <i>Pgcy-13::GOT-1</i>   | premotor INs (AVA); others                                          | +++       |
|                                | <i>Punc-47::GOT-1</i>   | GABAergic MNs                                                       | +++       |

4

1 **Table 2. A list of genetic mutants in metabolic and other biological pathways**  
 2 **examined for their genetic interactions with *ubr-1* mutants.**  
 3

| Biological Pathways  |                                      | Genes           | Alleles ( <i>lf</i> ) | Background                       | Reversals |
|----------------------|--------------------------------------|-----------------|-----------------------|----------------------------------|-----------|
| Glutamate Metabolism | Glutamate oxaloacetate transaminases | <i>got-1.2</i>  | <i>hp731</i>          | <i>ubr-1</i><br>( <i>hp684</i> ) | +++       |
|                      |                                      |                 | <i>hp731/mnDfl</i>    |                                  | +++       |
|                      |                                      | <i>got-1.1</i>  | <i>tm2311</i>         |                                  | -         |
|                      |                                      | <i>got-1.3</i>  | <i>tm3424</i>         |                                  | -         |
|                      | <i>got-2.1</i>                       | <i>gk109644</i> | -                     |                                  |           |
|                      | glutamic acid decarboxylase          | <i>unc-25</i>   | <i>e156</i>           |                                  | -         |
|                      | Glutamine synthetase                 | <i>gln-1</i>    | <i>gk329791</i>       |                                  | -         |
|                      |                                      |                 | <i>gk875298</i>       |                                  | -         |
|                      | Glutaminase                          | <i>glna-2</i>   | <i>gk536170</i>       |                                  | -         |
|                      | alanine aminotransferase             | <i>C32F10.8</i> | <i>tm2997</i>         |                                  | -         |
|                      | GABA transaminase                    | <i>gta-1</i>    | <i>ok517</i>          |                                  | -         |
| GABA transporter     | <i>snf-11</i>                        | <i>ok156</i>    | -                     |                                  |           |
| TCA Cycle            | isocitrate dehydrogenase             | <i>idhb-1</i>   | <i>ok2368</i>         | -                                |           |
|                      | pyruvate dehydrogenase               | <i>pdhk-2</i>   | <i>tm3233</i>         | -                                |           |
|                      | pyruvate carboxylase                 | <i>pyc-1</i>    | <i>tm3788</i>         | -                                |           |
|                      | pyruvate kinase                      | <i>pyk-1</i>    | <i>ok1754</i>         | -                                |           |
| Urea Cycle           | carbamoyl phosphate synthetase 1     | <i>T28F3.5</i>  | <i>tm4283</i>         | -                                |           |
| mTORC                | S6K                                  | <i>rsks-1</i>   | <i>ok1255</i>         | -                                |           |
| Heterochrony         | RNA binding                          | <i>lin-28</i>   | <i>n719</i>           | -                                |           |
|                      |                                      |                 | <i>n947</i>           |                                  |           |
| Apoptosis            | Caspase                              | <i>ced-3</i>    | <i>n717</i>           | -                                |           |
|                      | CED-4                                | <i>ced-4</i>    | <i>n1162</i>          | -                                |           |

4

## 1 **Supporting Information**

### 2 **Supplementary figure legends**

#### 3 **S1 Fig. *ubr-1* mutants exhibit reduced bending.**

4 A) Representative images of wildtype animals and two alleles of *ubr-1* mutants during  
5 reversals (left to right panels). The wildtype animal generates sinusoidal body bends,  
6 whereas *ubr-1*(*hp820*, *hp821*) animals do not bend. This defect was rescued by restoring  
7 the expression of UBR-1. Dots denote position of tail. Scale bar: 200 $\mu$ m. In *ubr-1*(*hp820*)  
8 (B) and *ubr-1*(*hp821*) (E) alleles (grey line), bending curvature is reduced throughout  
9 head to tail compared to wild type (black line), and this was rescued by restoring  
10 expression of UBR-1 using its endogenous promoter (red line). *ubr-1* mutants have fewer  
11 initiations (C, F) and longer durations for reversals (D, G). \*\*\*P<0.001, \*\*P<0.01, \*P<  
12 0.05 by the Two-way RM ANOVA test. Data are represented as mean  $\pm$  SEM. \*\*\*P<  
13 0.001, \*\*P<0.01, \*P< 0.05 by the Kruskal-Wallis test. Data are represented as mean  $\pm$   
14 SEM.

#### 15 **S2 Fig. UBR-1 and GOT-1 are expressed in AVA, AVE and RIM.**

16 A) A confocal image of animals expressing a functional UBR-1::GFP transgene from its  
17 endogenous promoter (green), and the *Pnmr-1*-RFP reporter (red). B) A confocal image  
18 of animals expressing endogenous GOT-1::GFP from the knock-in allele (green), and the  
19 *Pnmr-1*-RFP reporter (red). Robust expression of UBR-1 and GOT-1 was present at the  
20 pharynx; neuronal UBR-1::GFP and GOT-1::GFP signals were present in the AVA, AVE  
21 and RIM premotor interneurons (denoted), and other unidentified neurons (not shown).  
22 Scale bar, 5  $\mu$ m.

1 **S3 Fig. *ubr-1* function is required in premotor interneurons to regulate reversals.**

2 A-B) In *ubr-1* mutants, the reversal duration is increased, while reversal initiation  
3 frequency is decreased. Both the parameters were rescued by restoring the expression of  
4 UBR-1 in premotor interneurons, but not in GABAergic or cholinergic motor neurons. C-  
5 D) Expression of UBR-1 in multiple premotor interneurons, which include AVE/RIM  
6 exhibited significant rescue of *ubr-1* for reversal duration and initiation frequency.  
7 Expression of UBR-1 in the RIM alone or in AVA alone did not result in rescue.  
8 \*P<0.05, \*\*P<0.01, \*\*\*P<0.001 by the Kruskal-Wallis test. Data are represented as  
9 mean ± SEM.

10 **S4 Fig. GOT-1 function in premotor interneurons is required to suppress *ubr-1*'s**  
11 **reversal defects.**

12 The functional loss of *got-1* restores the reversal duration (A) and the reversal initiation  
13 frequency (B) in *ubr-1* mutants. Restoring GOT-1 expression in multiple premotor  
14 interneurons, including AVE and RIM, reverted the reversal duration of *ubr-1; got-1* to  
15 that of *ubr-1* (A), whereas the reversal initiation frequency exhibited the trend of decrease  
16 but did not reach statistic significance (B). Expression of GOT-1 in RIM alone had no  
17 effect, while the expression of GOT-1 in AVA partially reverted the reversal duration.  
18 \*P<0.05, \*\*P<0.01, \*\*\*P<0.001 by the Kruskal-Wallis test. Data are represented as  
19 mean ± SEM.

20 **S5 Fig. Metabolites of the TCA cycle in *ubr-1*, *got-1* and *ubr-1; got-1* mutants did not**  
21 **exhibit consistent changes from wildtype animals.**

1 Metabolite levels measured by LC-MS, normalized against the total protein level in the  
2 lysate. All mutants were normalized to that of wildtype animals. Metabolites of the TCA  
3 cycle did not show any coordinated changes among these mutants.

4 **S6 Fig. The AVA and AVE somata exhibit morphological changes in *ubr-1* mutants**  
5 **by the end of larval stage development**

6 A) Confocal images of the AVA and AVE premotor interneuron somata in wildtype and  
7 *ubr-1* animals, which were labeled with cytosolic RFP, from the L1 juvenile larva to  
8 adult stages. Depending on the focal planes, some images contain that of nuclei, which  
9 were devoid of RFP signals. Left panels: images from wildtype animals. The surface of  
10 both somata was round and smooth throughout larval development and in young adults.  
11 Right panels: images from *ubr-1* mutants. In young (L1 to L3) larva, somata appeared  
12 similar to those in age-matched wildtype animals. In the L4 larva and adult animals,  
13 somata developed rough surface and short branches, denoted by arrows. B) The RIM  
14 soma exhibited normal morphology in adults, similar to wildtype animals. C) The round  
15 morphology AVA and AVE somata in *ubr-1* adults were restored in *ubr-1; got-1* double  
16 mutant adults, and in *ubr-1* adults with restored UBR-1 expression in multiple premotor  
17 interneurons including AVE and RIM. Asterisks (\*) mark the AVA or AVE axons, which  
18 could not be shown in some panels when they were in a different focal plane as the  
19 somata. Scale bar, 2 $\mu$ m (for the L1 and L2 panels) 5  $\mu$ m (for the L3 to adult panels).

20 **Supplementary movie captions**

21 **S1 Movie: Reversal behaviors exhibited by the wildtype (N2) (Part 1) and *ubr-***  
22 ***1(hp684; lf)* (Part 2) young adults.**

23 The *ubr-1* mutant exhibits prominent rigidity during reversals.

1 **S2 Movie. Reversal behaviors exhibited by *ubr-1*(*hp684; lf*) (Part 1), *got-1*(*hp731; lf*)**  
2 **(Part 2), and *ubr-1*(*hp684; lf*); *got-1*(*hp731; lf*) (Part 3) young adults.**

3 The functional loss of GOT-1.2 in the *ubr-1* mutant background led to significant  
4 improvement of body bending during reversals.

5 **S3 Movie. Reversal behaviors exhibited by *lin-28*(*n719; lf*) (Part 1), and *ubr-***  
6 ***1*(*hp684; lf*) *lin-28*(*n719; lf*) (Part 2) young adults.**

7 The functional loss of the LIN-28 protein in the *ubr-1*(*hp684; lf*) mutants did not improve  
8 body bending during reverses.

1 **Table S1. Strains generated or acquired for this study.**

2 **a. Non-transgenic strains generated for genetic interactions with *ubr-1***

| Strain Names | Genotypes                                                                                          |
|--------------|----------------------------------------------------------------------------------------------------|
| ZM8230       | <i>ubr-1</i> ( <i>hp684</i> )                                                                      |
| ZM8219       | <i>ubr-1</i> ( <i>hp820</i> )                                                                      |
| ZM8201       | <i>ubr-1</i> ( <i>hp821</i> )                                                                      |
| ZM8202       | <i>ubr-1</i> ( <i>hp821 hp833</i> )                                                                |
| ZM6660       | <i>got-1</i> ( <i>hp731</i> )                                                                      |
| ZM8226       | <i>ubr-1</i> ( <i>hp684</i> ); <i>got-1</i> ( <i>hp731</i> )                                       |
| ZM9104       | <i>ubr-1</i> ( <i>hp684</i> ); <i>got-1</i> ( <i>hp731</i> )/ <i>mnDfl</i>                         |
| ZM7589       | <i>ubr-1</i> ( <i>hp684</i> ); <i>got-1.1</i> ( <i>tm2311</i> )                                    |
| ZM7580       | <i>ubr-1</i> ( <i>hp684</i> ); <i>got-1.3</i> ( <i>tm3424</i> )                                    |
| ZM8394       | <i>ubr-1</i> ( <i>hp684</i> ) <i>got-2.1</i> ( <i>gk109644</i> )                                   |
| ZM7373       | <i>ubr-1</i> ( <i>hp684</i> ); <i>unc-25</i> ( <i>e156</i> )                                       |
| ZM7903       | <i>ubr-1</i> ( <i>hp684</i> ); <i>gln-1</i> ( <i>gk329791</i> )                                    |
| ZM7904       | <i>ubr-1</i> ( <i>hp684</i> ); <i>glna-2</i> ( <i>gk536170</i> )                                   |
| ZM7677       | <i>ubr-1</i> ( <i>hp684</i> ); <i>C32F10.8</i> ( <i>tm2997</i> )                                   |
| ZM7588       | <i>ubr-1</i> ( <i>hp684</i> ); <i>gta-1</i> ( <i>ok517</i> )                                       |
| ZM7905       | <i>ubr-1</i> ( <i>hp684</i> ); <i>snf-11</i> ( <i>ok156</i> )                                      |
| ZM7291       | <i>ubr-1</i> ( <i>hp684</i> ); <i>idhb-1</i> ( <i>ok2368</i> )                                     |
| ZM7583       | <i>ubr-1</i> ( <i>hp684</i> ); <i>pdhk-2</i> ( <i>tm3233</i> )                                     |
| ZM7584       | <i>ubr-1</i> ( <i>hp684</i> ); <i>pyc-1</i> ( <i>tm3233</i> )                                      |
| ZM7908       | <i>ubr-1</i> ( <i>hp684</i> ); <i>pyk-1</i> ( <i>ok1754</i> )                                      |
| ZM7585       | <i>ubr-1</i> ( <i>hp684</i> ); <i>T28F3.5</i> ( <i>tm4283</i> )                                    |
| ZM7591       | <i>ubr-1</i> ( <i>hp684</i> ); <i>rsks-1</i> ( <i>ok1255</i> )                                     |
| ZM10005      | <i>ubr-1</i> ( <i>hp865</i> ) <i>lin-28</i> ( <i>n719</i> )                                        |
| ZM9971       | <i>ubr-1</i> ( <i>hp865</i> ) <i>lin-28</i> ( <i>n947</i> )                                        |
| ZM8368       | <i>ubr-1</i> ( <i>hp684</i> ); <i>ced-3</i> ( <i>n717</i> ) <i>hpIs202*</i> (* <i>RID</i> marker)  |
| ZM8368       | <i>ubr-1</i> ( <i>hp684</i> ); <i>ced-4</i> ( <i>n1162</i> ) <i>hpIs316*</i> (* <i>RID</i> marker) |

3

4 **b. Transgenic strains generated for A-MN calcium imaging**

| Strain Names | Genetic Backgrounds                                             | Transgenes      | Plasmid Names (Description)                |
|--------------|-----------------------------------------------------------------|-----------------|--------------------------------------------|
| ZM8426       | -                                                               | <i>hpIs460</i>  | pJH3137 ( <i>Punc-4-GCaMP6s::wCherry</i> ) |
| ZM8749       | <i>ubr-1</i> ( <i>hp684</i> )                                   |                 |                                            |
| ZM8750       | <i>ubr-1</i> ( <i>hp684</i> );<br><i>got-1</i> ( <i>hp731</i> ) |                 |                                            |
| ZM8846       | <i>ubr-1</i> ( <i>hp684</i> )                                   | <i>hpIs460</i>  | pJH3137 ( <i>Punc-4-GCaMP6s::wCherry</i> ) |
|              |                                                                 | <i>hpEx3676</i> | pJH3476 ( <i>Popt-3::UBR-1</i> minigene)   |

5



1 **c. Transgenic strains generated for behavioral rescue, gene expression, and biochemistry**  
 2 **experiments.**

3

| Gene                 | Strain | Backgrounds                           | Trans-genes                               | Plasmids                                                                                                                  |
|----------------------|--------|---------------------------------------|-------------------------------------------|---------------------------------------------------------------------------------------------------------------------------|
| <b>U<br/>B<br/>R</b> | ZM7440 | <i>ubr-1(hp684)</i>                   | <i>hpEx3161</i>                           | pJH2913 ( <i>Pubr-1::UBR-1</i> )                                                                                          |
|                      | ZM8272 | <i>ubr-1(hp821hp833)</i>              | <i>hpEx3482</i>                           |                                                                                                                           |
|                      | ZM8270 | <i>ubr-1(hp820)</i>                   | <i>hpEx3480</i>                           |                                                                                                                           |
|                      | ZM8271 | <i>ubr-1(hp821)</i>                   | <i>hpEx3481</i>                           |                                                                                                                           |
|                      | ZM7410 | <i>lin-15(n765)</i>                   | <i>hpEx3056</i>                           | pJH2963 ( <i>Pubr-1::GFP</i> )                                                                                            |
|                      | ZM8628 | -                                     | <i>hpIs487</i>                            | pJH2965 ( <i>Pubr-1::GFP::UBR-1</i> )                                                                                     |
|                      | ZM8389 | <i>ubr-1(hp684)</i>                   | <i>hpEx3535</i>                           | pJH3380 ( <i>Prgef-1::UBR-1 minigene</i> )                                                                                |
|                      | ZM8388 |                                       | <i>hpEx3536</i>                           | pJH3381 ( <i>Pmyo-3::UBR-1 minigene</i> )                                                                                 |
|                      | ZM8390 |                                       | <i>hpEx3537</i>                           | pJH3382 ( <i>Punc-47::UBR-1 minigene</i> )                                                                                |
|                      | ZM8391 |                                       | <i>hpEx3538</i>                           | pJH3389 ( <i>Pacr-2::UBR-1 minigene</i> )                                                                                 |
|                      | ZM8404 |                                       | <i>hpEx3541</i>                           | pJH3390 ( <i>Pglr-1::UBR-1 minigene</i> )                                                                                 |
|                      | ZM8457 |                                       | <i>hpEx3564</i>                           | pJH3436 ( <i>Pnmr-1::UBR-1 minigene</i> )                                                                                 |
|                      | ZM8551 |                                       | <i>hpEx3595</i>                           | pJH3469 ( <i>Prig-3::UBR-1 minigene</i> )                                                                                 |
|                      | ZM8550 |                                       | <i>hpEx3596</i>                           | pJH3476 ( <i>Popt-3::UBR-1 minigene</i> )                                                                                 |
|                      | ZM8582 |                                       | <i>hpEx3597</i>                           | pJH3485 ( <i>Plgc-55s::UBR-1 minigene</i> )                                                                               |
|                      | ZM8627 |                                       | <i>hpEx3622</i>                           | pJH3502 ( <i>Pgcy-13::UBR-1 minigene</i> )                                                                                |
|                      | ZM8580 | <i>hpEx3599</i>                       | pJH3487 ( <i>Pttx-3::UBR-1 minigene</i> ) |                                                                                                                           |
|                      | ZM8581 | <i>hpEx3598</i>                       | pJH3486 ( <i>Pinx-1::UBR-1 minigene</i> ) |                                                                                                                           |
| <b>G<br/>O<br/>T</b> | ZM7289 | <i>TTti5605</i>                       | <i>hpSi10</i>                             | pJH2998 ( <i>GOT-1.2::GFP MosCI</i> )                                                                                     |
|                      | ZM8458 |                                       | <i>hpSi16</i>                             | pJH3396<br>( <i>Prgef-1::GOT-1.2 MosCI</i> )                                                                              |
|                      | ZM8460 |                                       | <i>hpSi18</i>                             | pJH3397<br>( <i>Pglr-1::GOT-1.2 MosCI</i> )                                                                               |
|                      | ZM8462 |                                       | <i>hpSi20</i>                             | pJH3399<br>( <i>Punc-47::GOT-1.2 MosCI</i> )                                                                              |
|                      | ZM8497 |                                       | <i>hpSi22</i>                             | pJH3471 ( <i>Prig-3::GOT-1.2 MosCI</i> )                                                                                  |
|                      | ZM8760 | <i>ubr-1(hp684);<br/>got-1(hp731)</i> | <i>hpEx3661</i>                           | pJH3531 ( <i>Popt-3::GOT-1.2</i> )                                                                                        |
|                      | ZM8759 |                                       | <i>hpEx3621</i>                           | pJH3501 ( <i>Pgcy-13::GOT-1.2</i> )                                                                                       |
|                      | ZM8102 |                                       | <i>hpEx3998</i>                           | pJH2896 ( <i>Pmyo-3::GOT-1.2</i> )                                                                                        |
|                      | ZM8631 | -                                     | <i>hpIs484</i>                            | pJH3437 ( <i>Prgef-1::GOT-1::GFP</i> )                                                                                    |
|                      | ZM9008 | -                                     | <i>hp881</i>                              | pJH3621 ( <i>targeting construct for<br/>generating C-terminal GFP insertion at<br/>the endogenous locus of GOT-1.2</i> ) |
|                      | ZM9077 | <i>ubr-1(hp684)</i>                   |                                           |                                                                                                                           |
|                      | ZM9084 | <i>ubr-1(hp821hp833)</i>              |                                           |                                                                                                                           |

4

**A**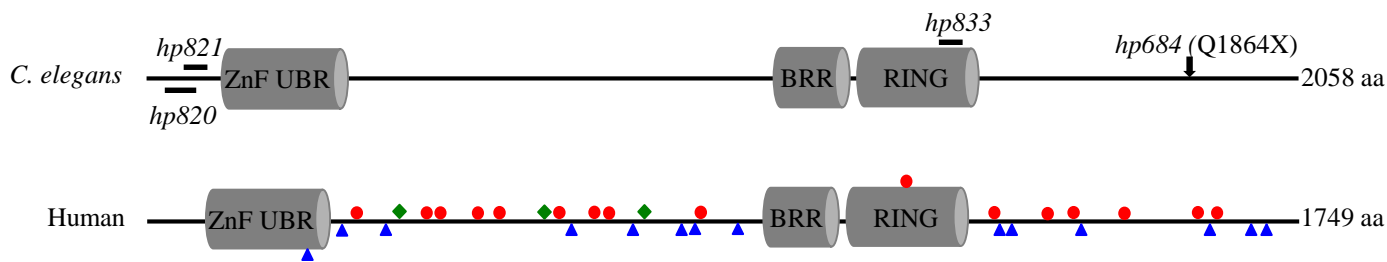**B**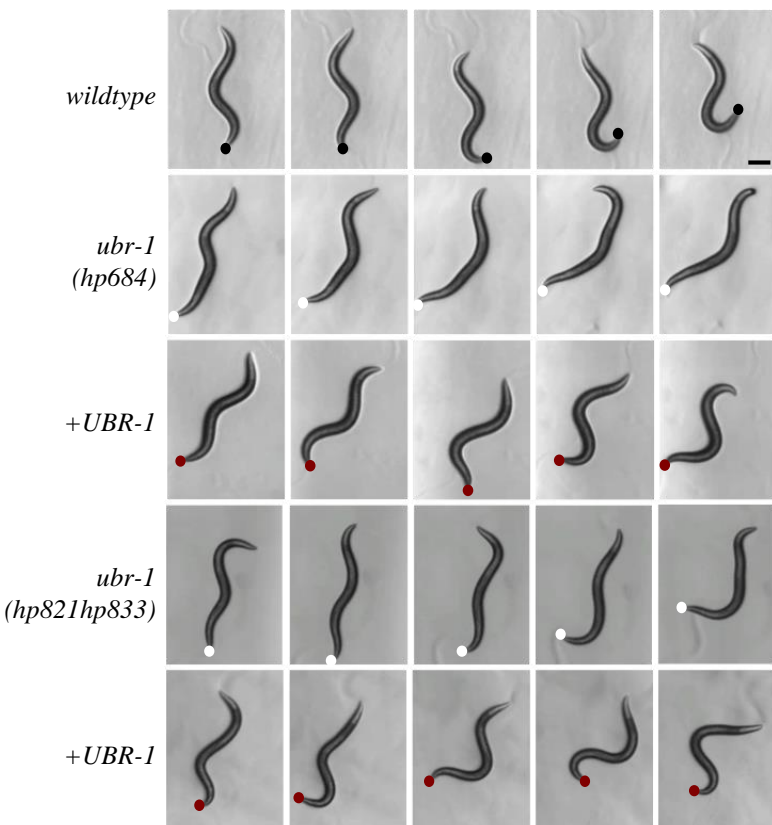**C**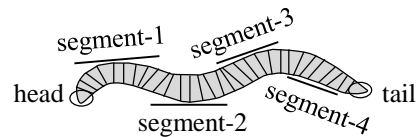**D**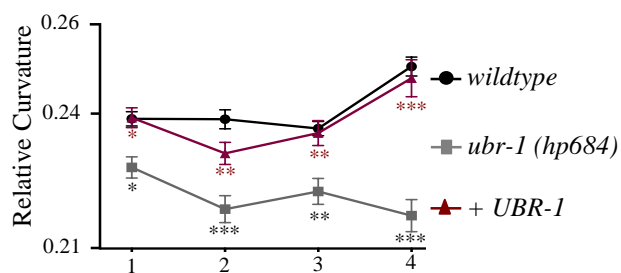**E**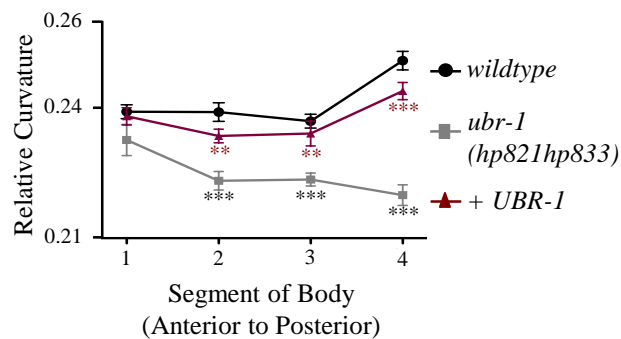**F**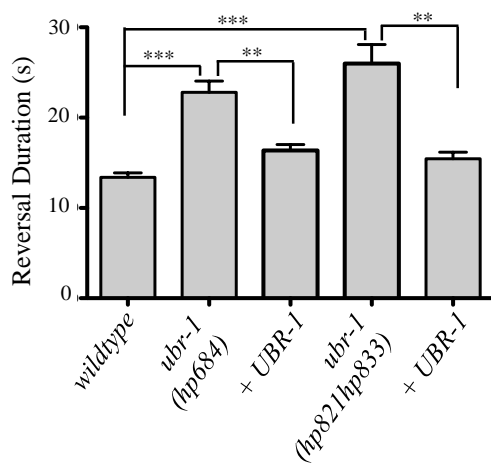**G**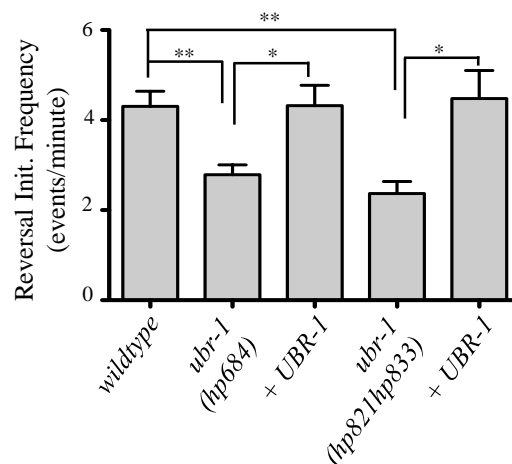

Figure 1

**A**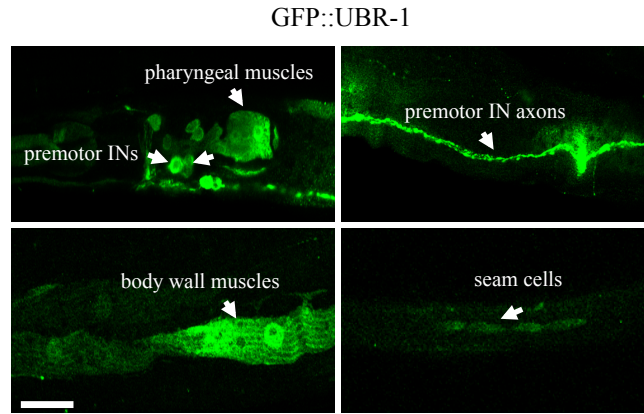**B**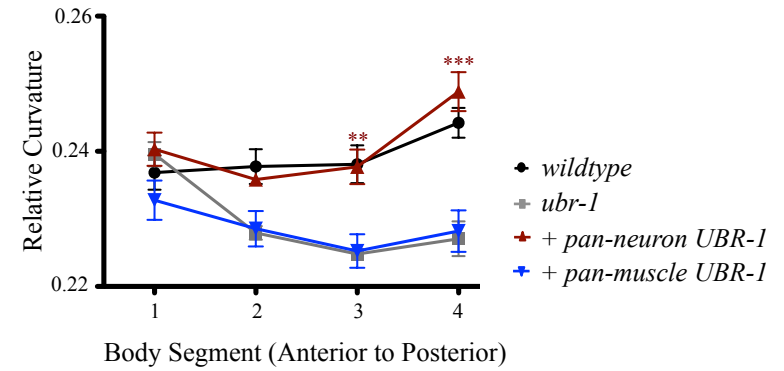**C**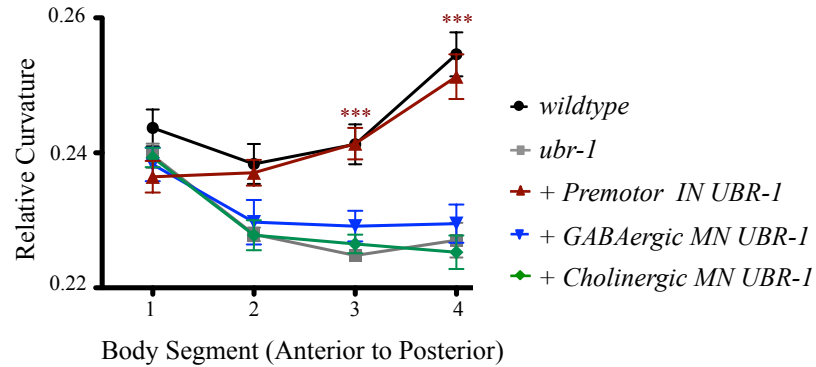**D**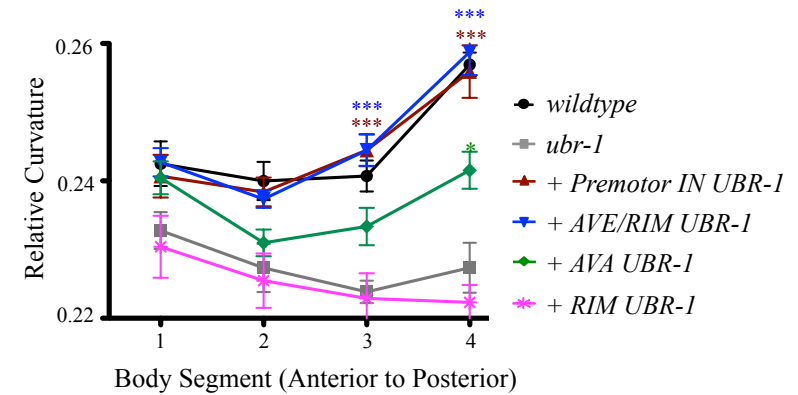

Figure 2

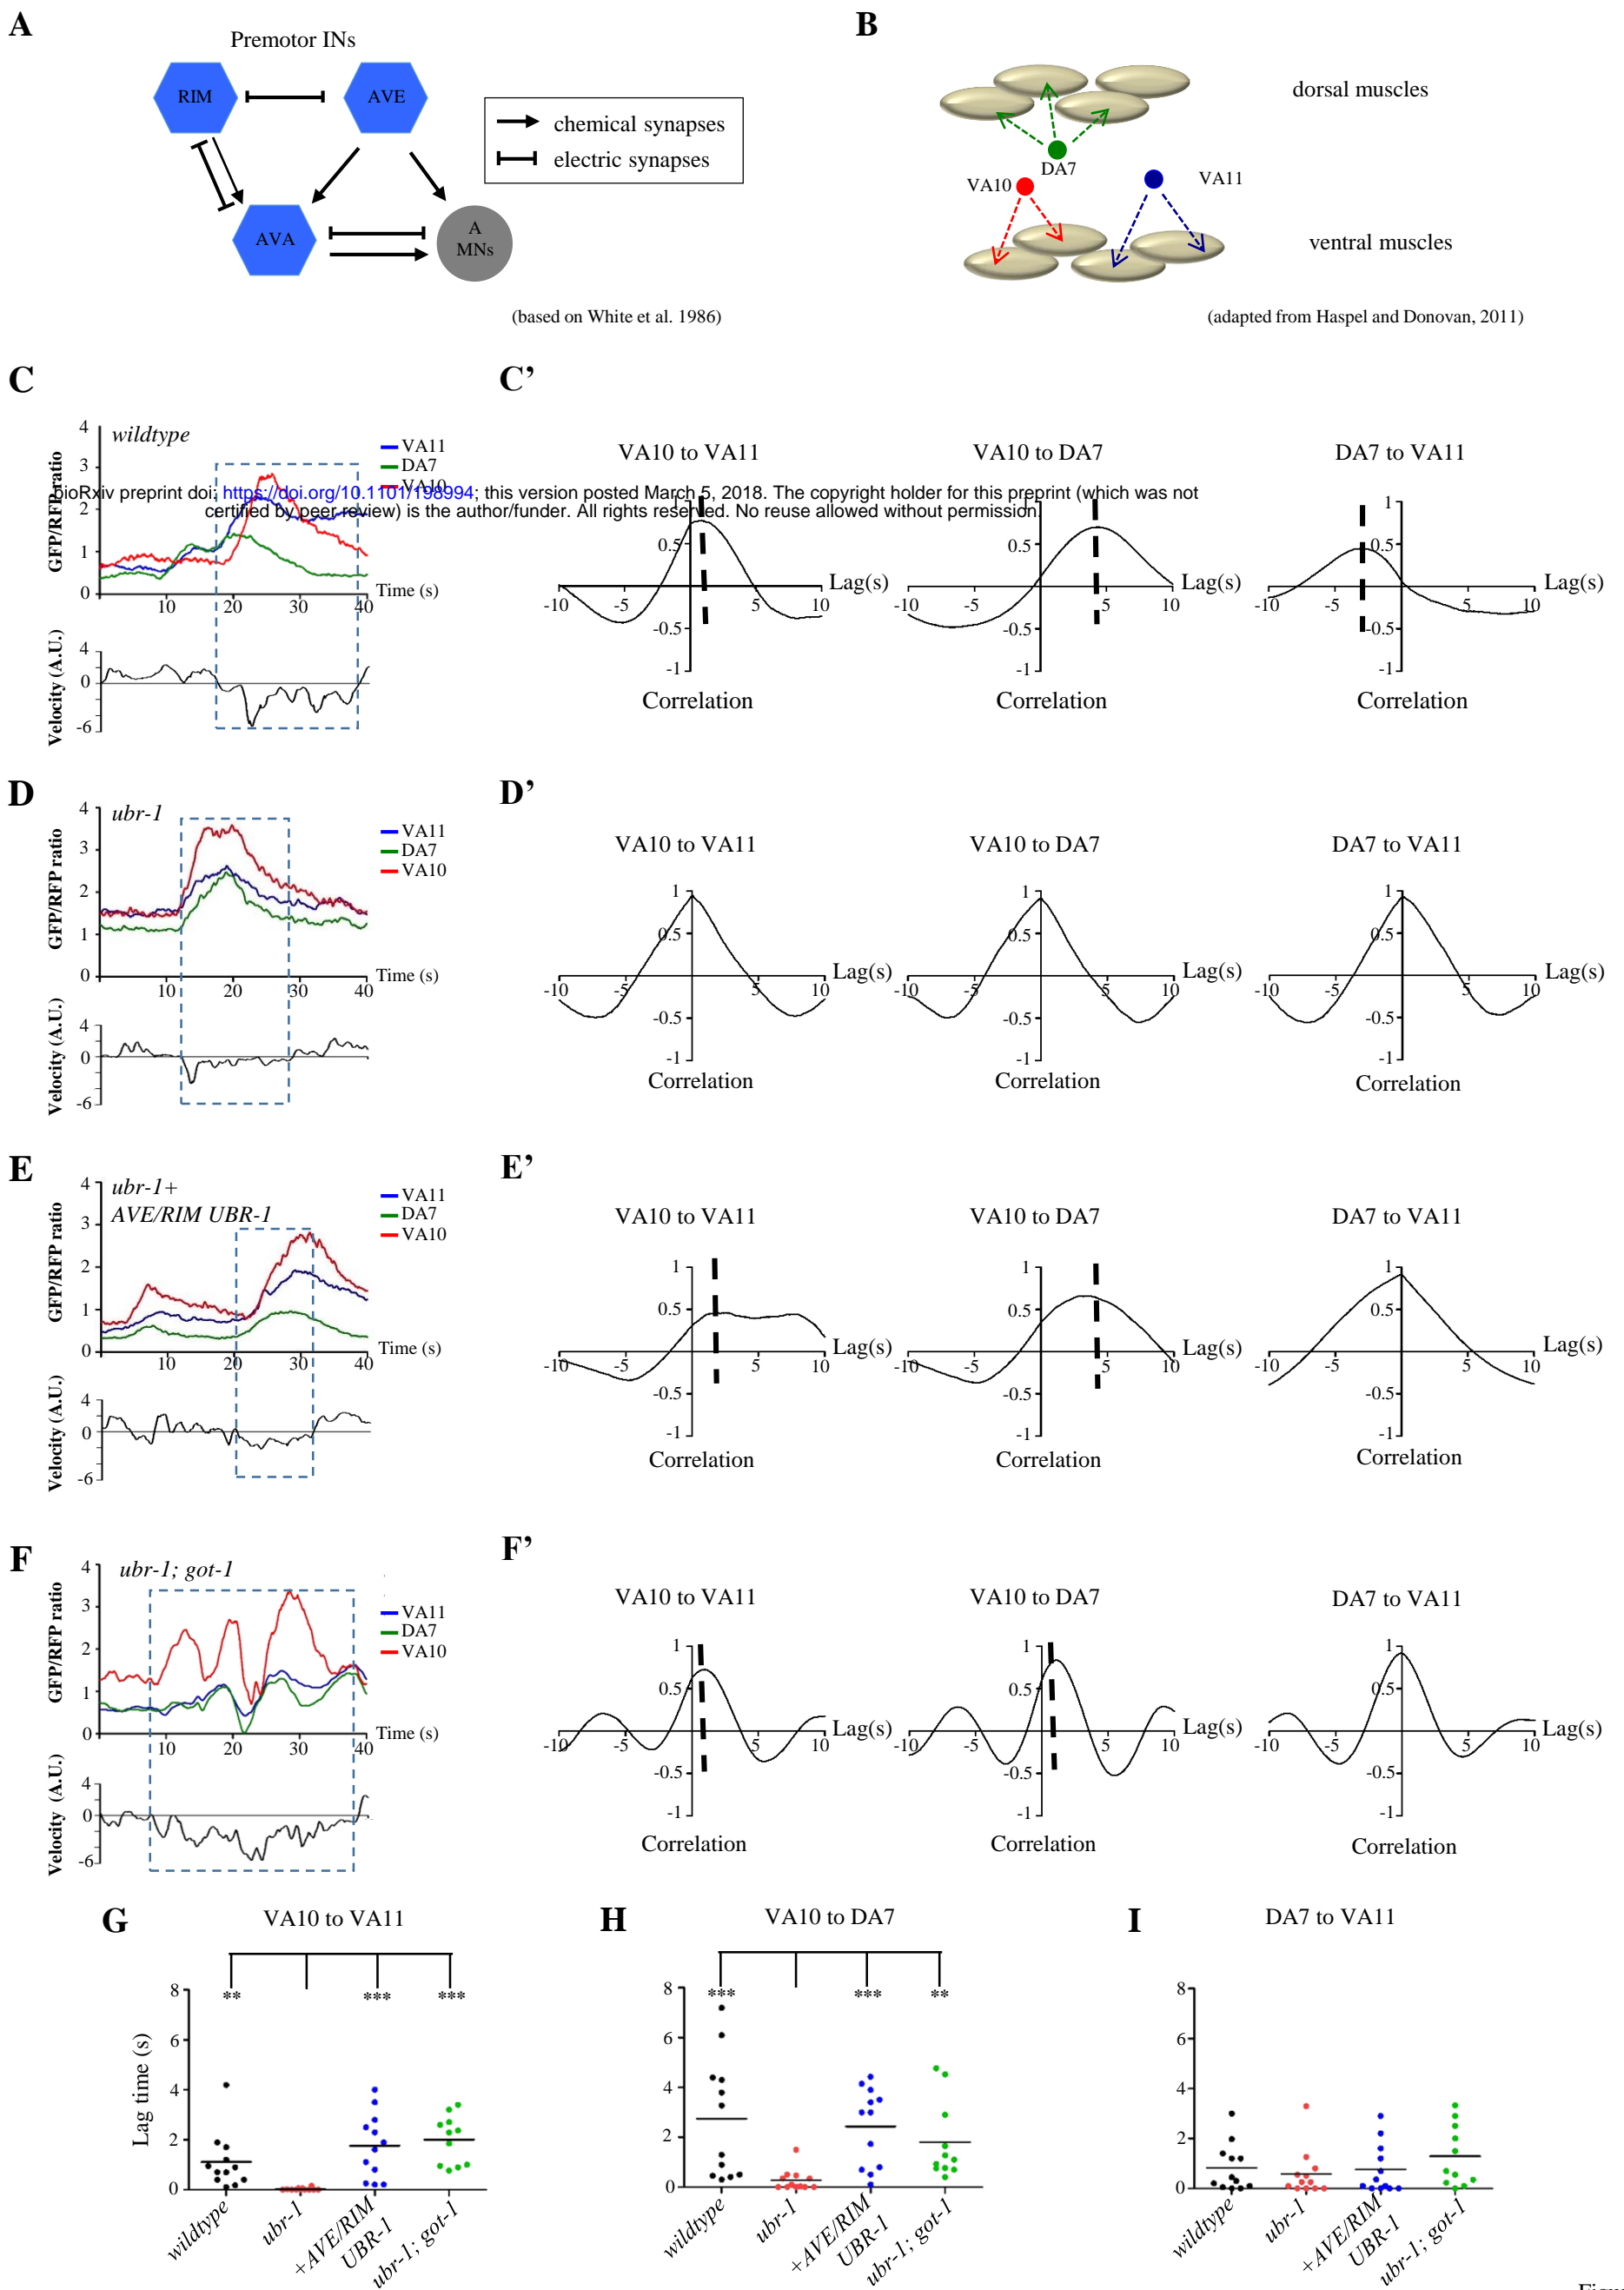

Figure 3

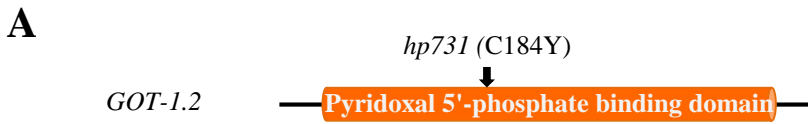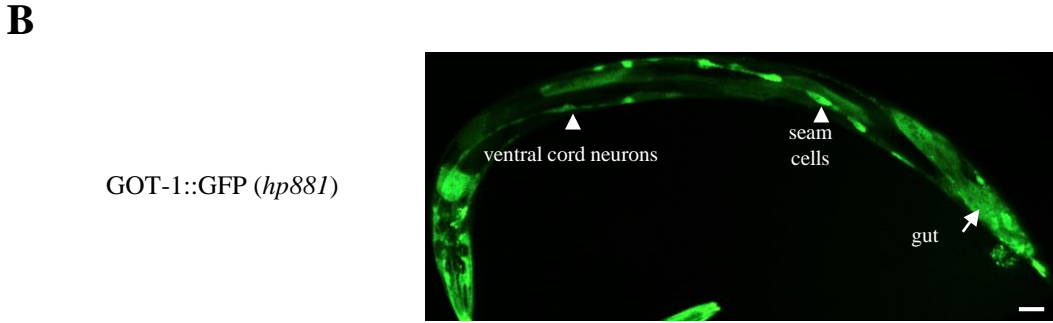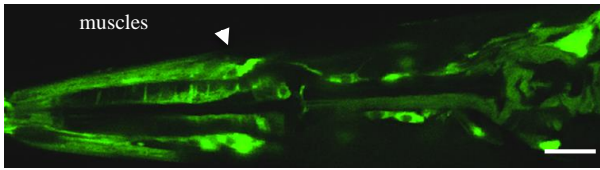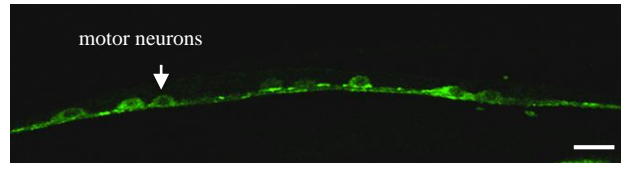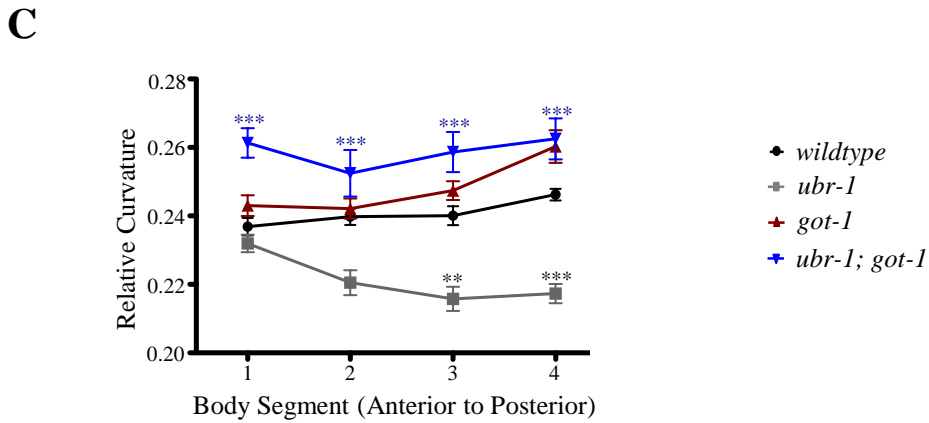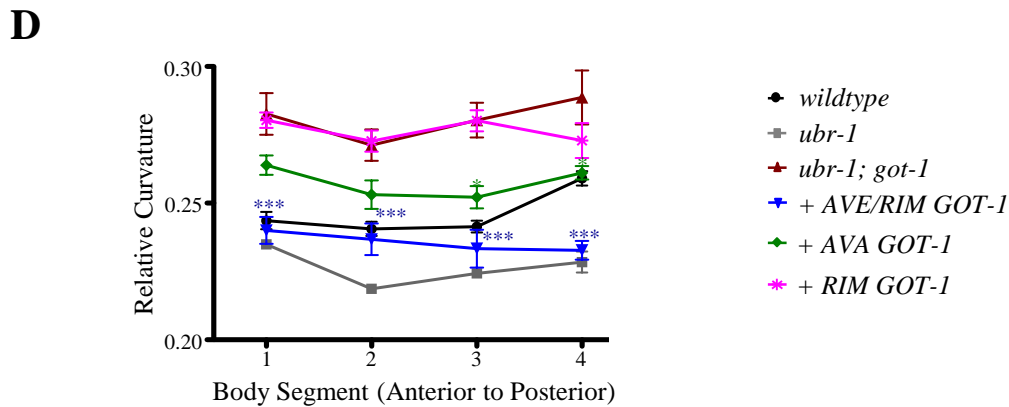

Figure 4

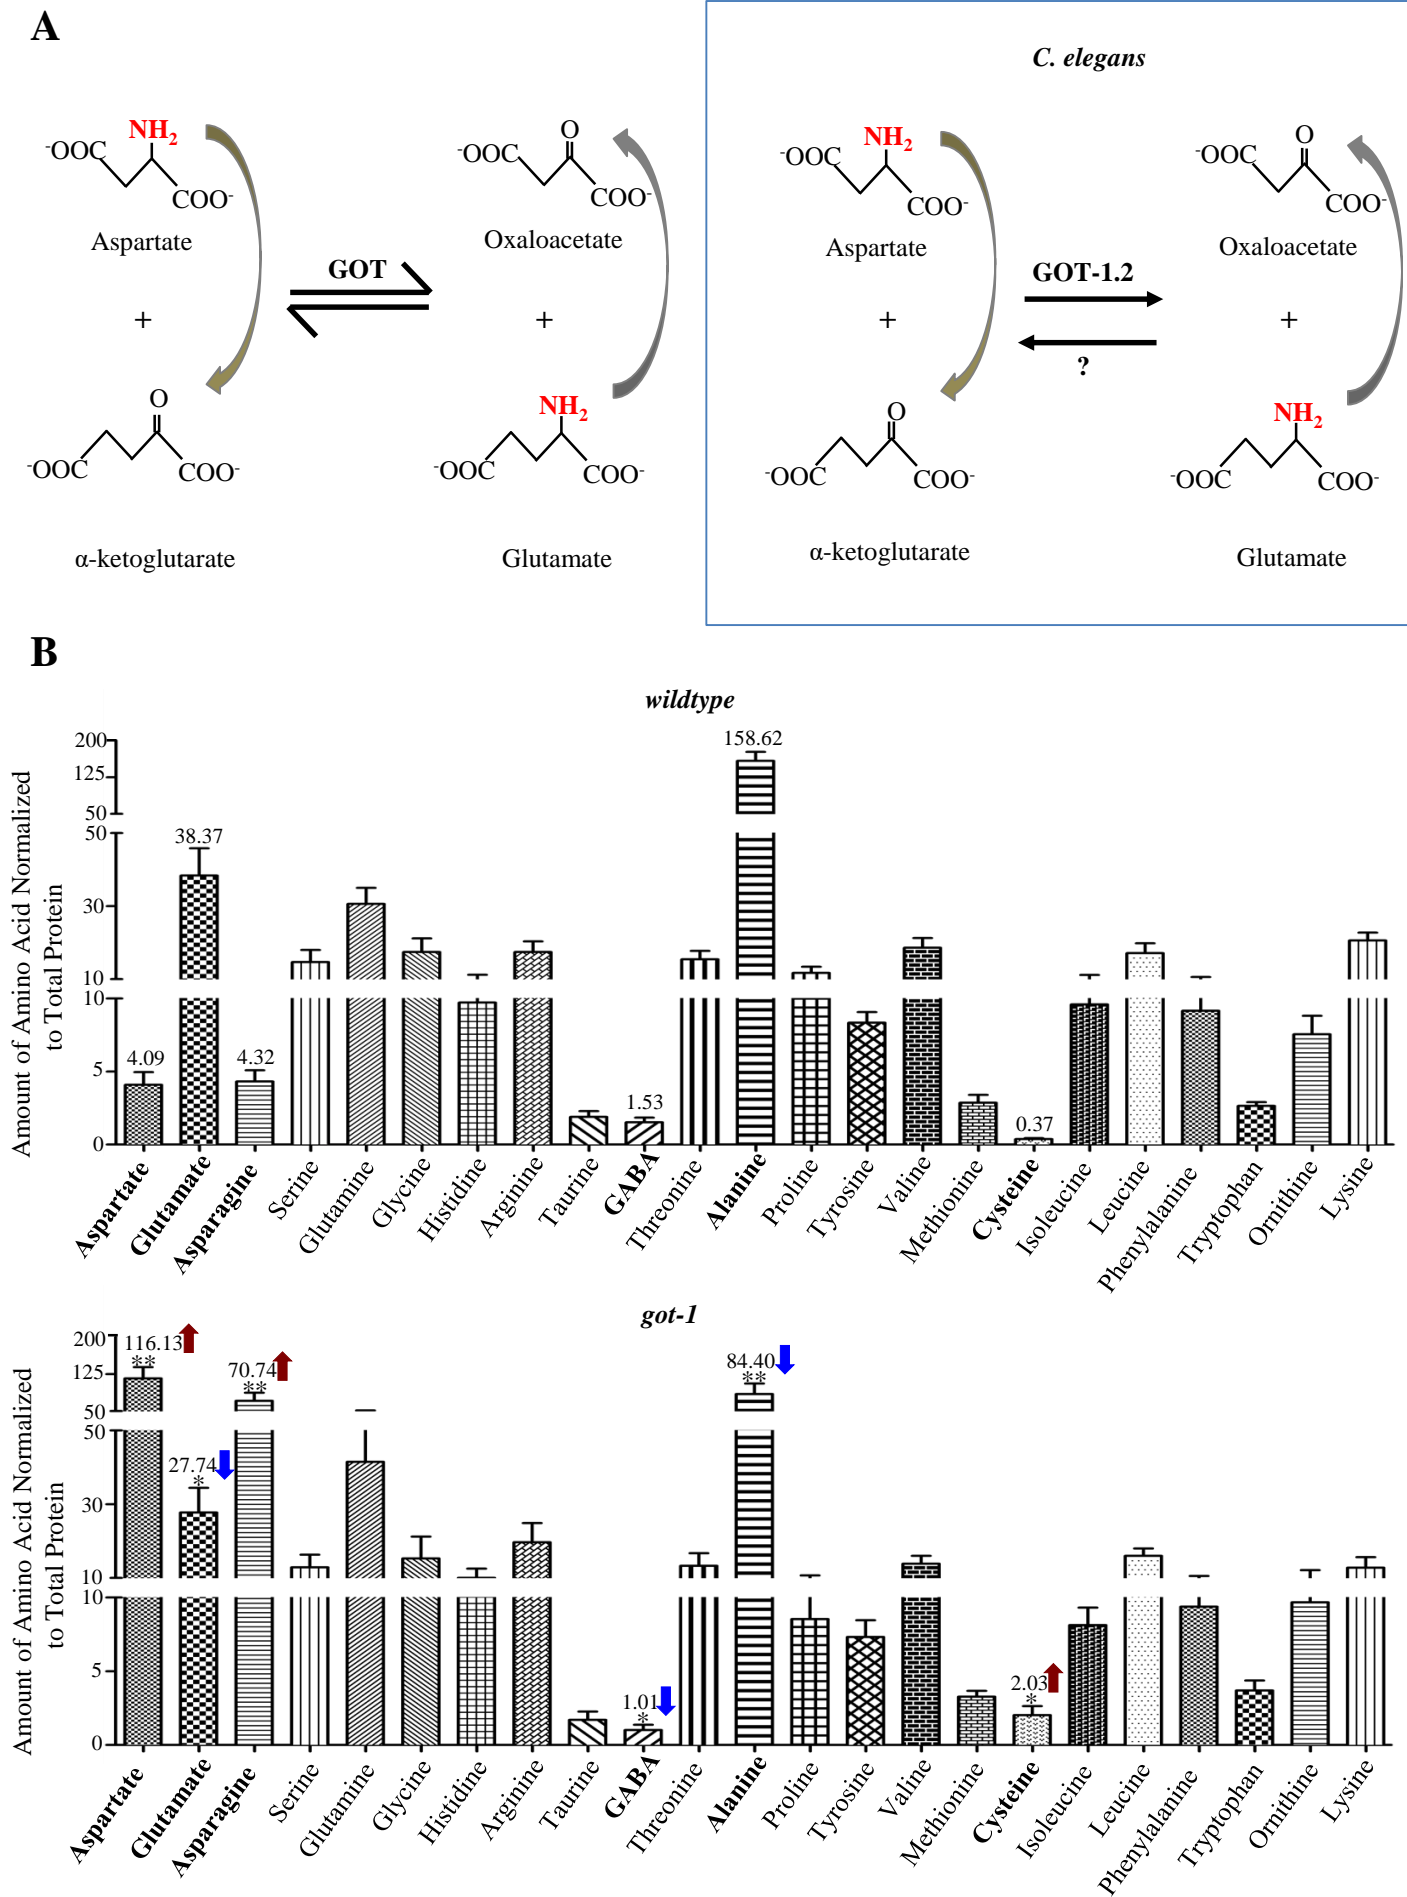

Figure 5

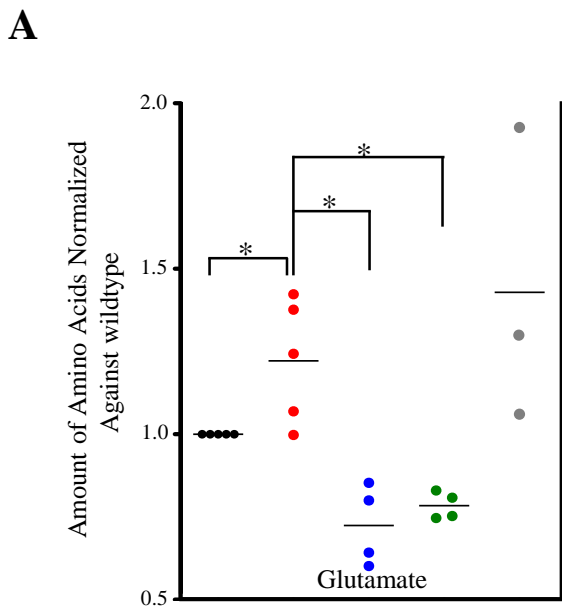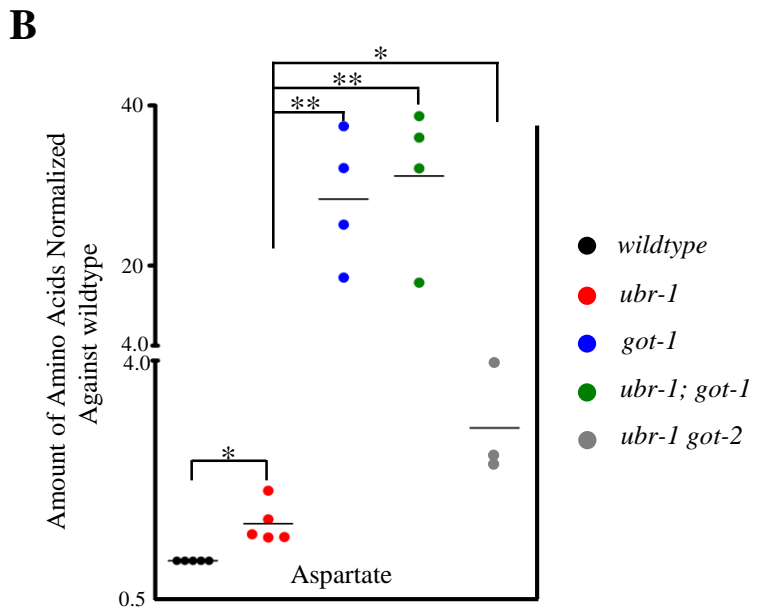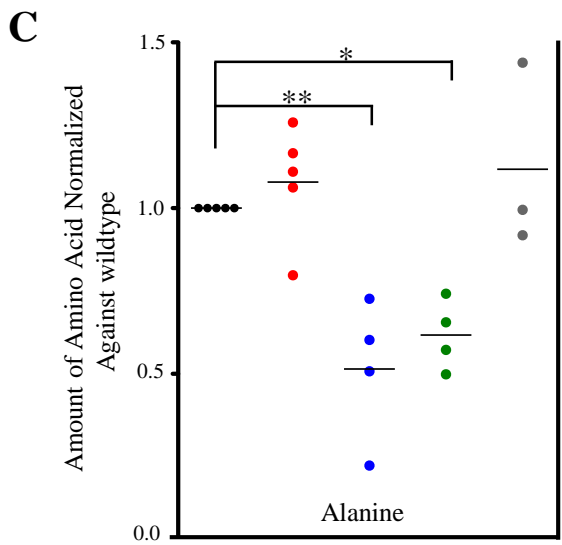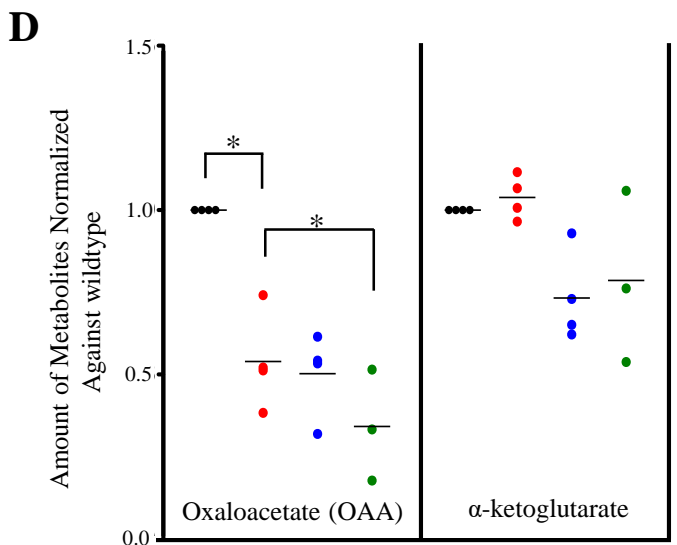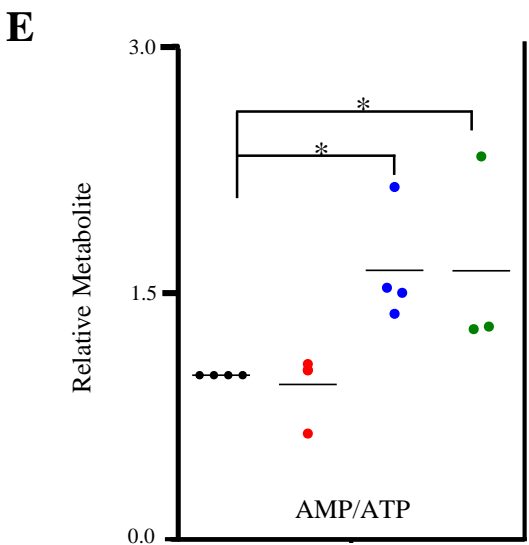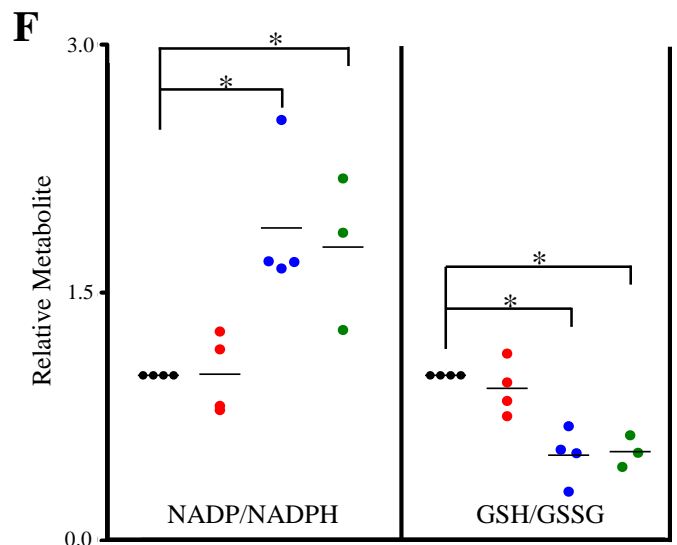

Figure 6

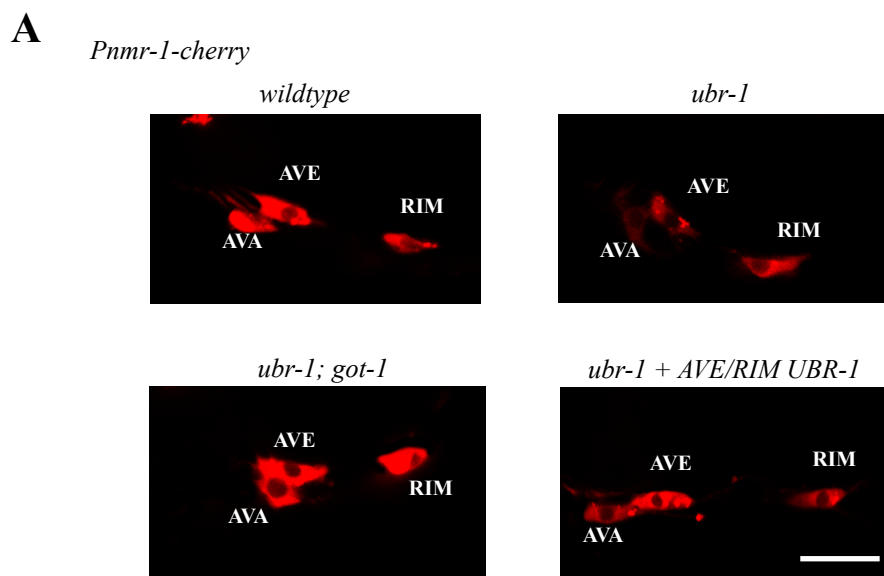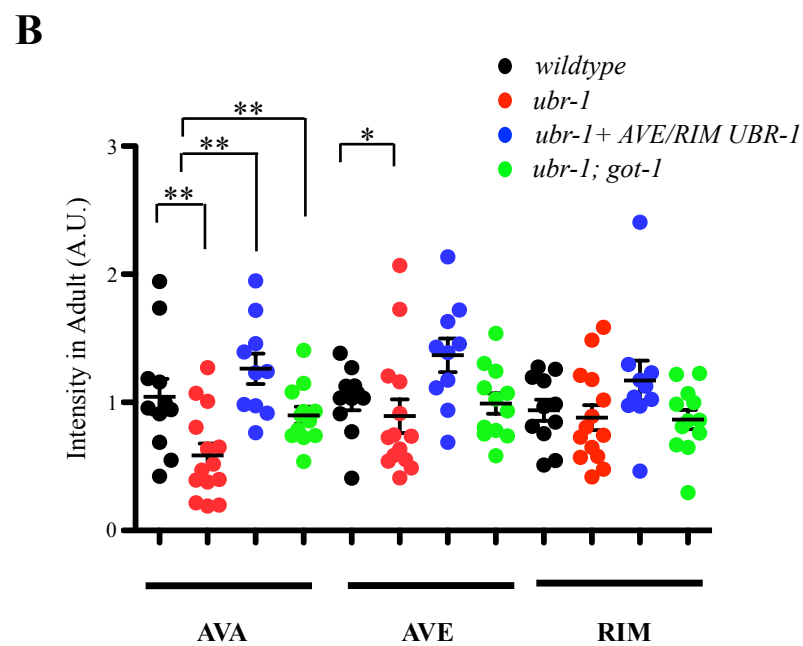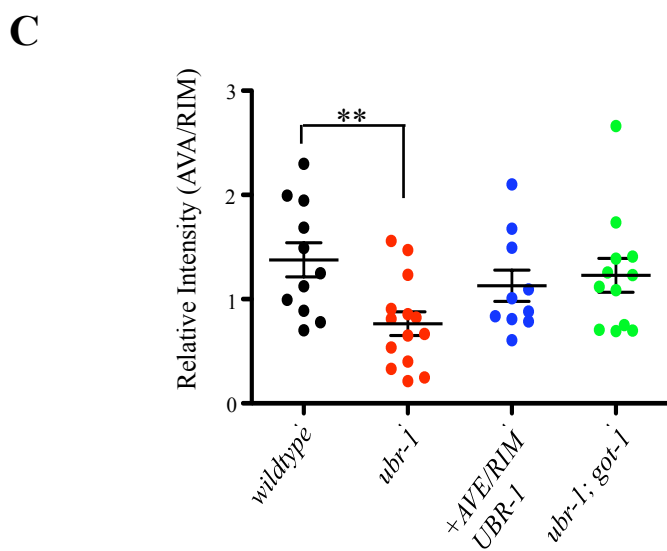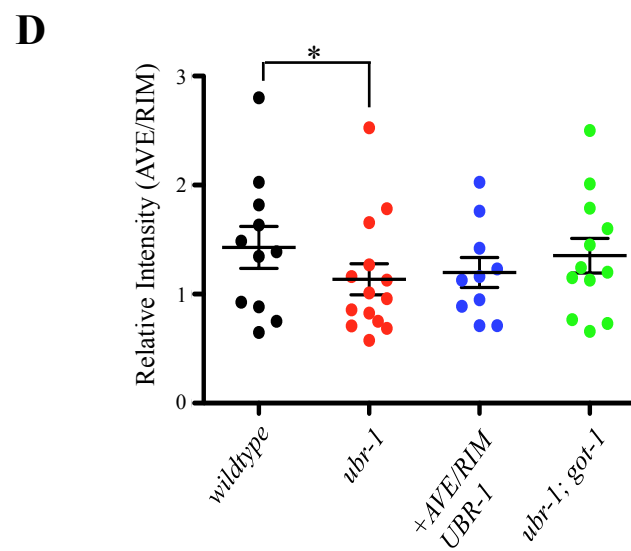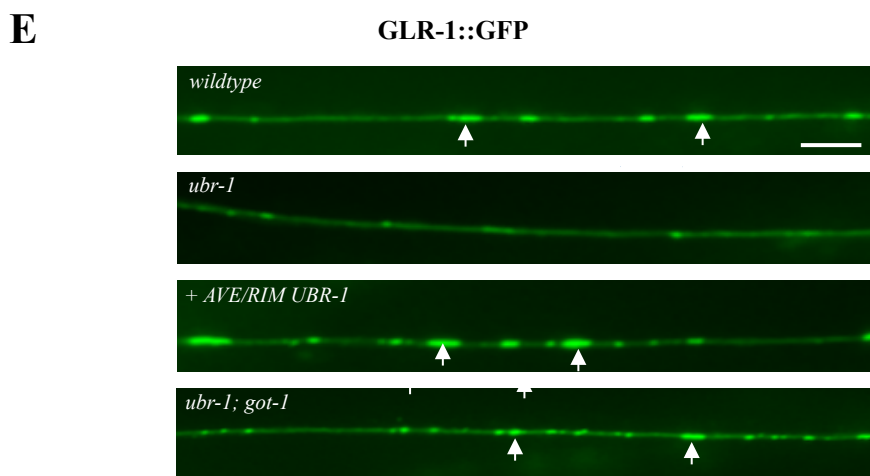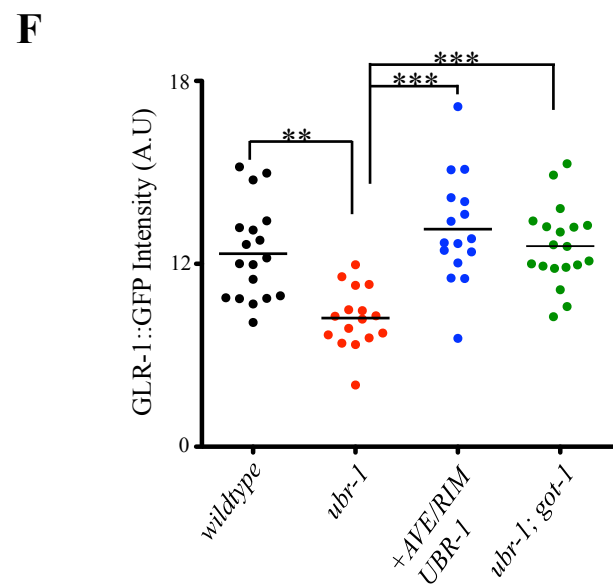



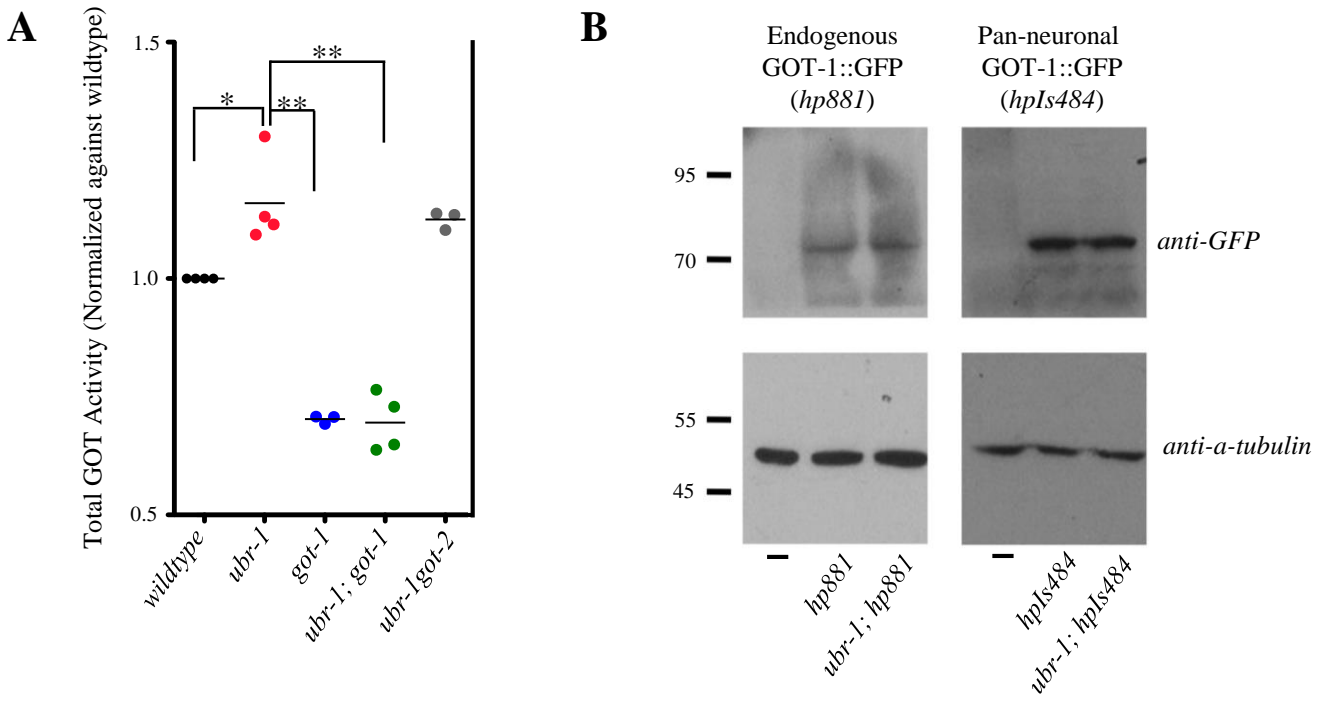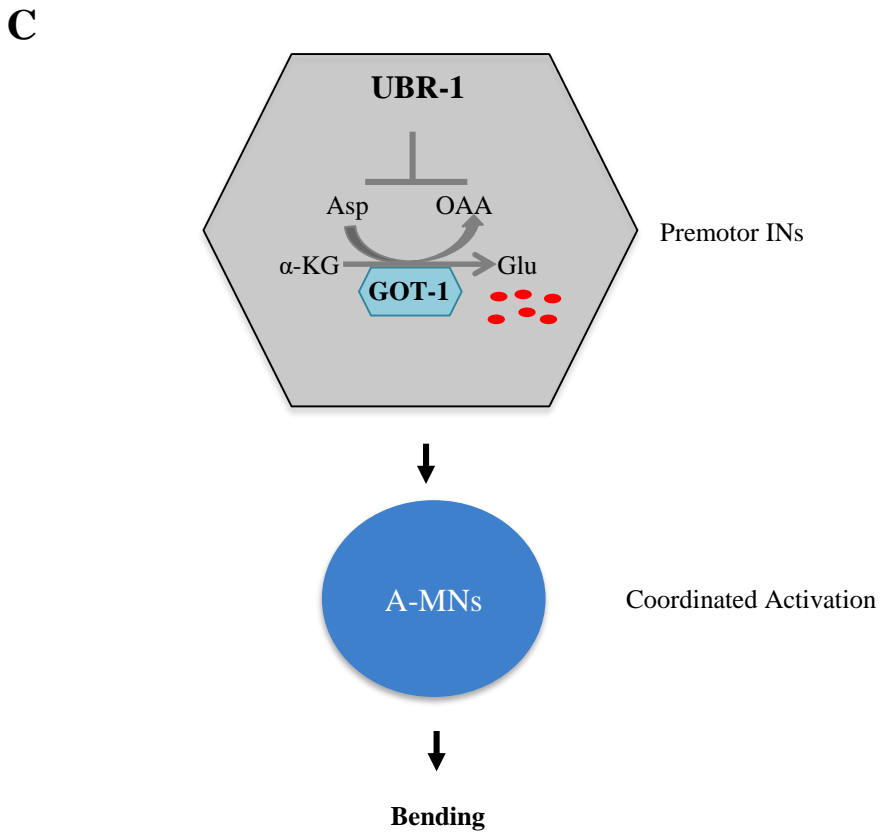

Figure 8
